# Supplementary material for: Growth Developmental Defects of Mitochondrial Iron Transporter 1 and 2 Mutants in Arabidopsis in Iron Sufficient Conditions
Source: Preprints.org preprint supplement (doi:10.20944/preprints202301.0097.v1), 2023-01-05
Supplement: Supplementary file 1 [file supplementary]

## Sheet: table S5
			log2 (normalized expression)											Average (normalized expression)		Expression relative to the wild type
AGI number	symbol	description	Col0 1	Col0 2	Col0 3	compensated 1	compensated 2	compensated 3	affected mutant, same dev stage, 1	affected mutant, same dev stage, 2	affected mutant, same dev stage, 3		Col0	compensated	affected mutant, same dev stage	compensated	affected mutant, same dev stage
AT1G01670	PUB56	RING/U-box superfamily protein; U-box domain-containing protein 56; RING-type E3 ubiquitin transferase PUB56	3.72057	3.61587	3.81759	2.93172	3.70303	3.7031	5.16479	5.35222	5.29755		12.1807	10.2259	37.6836	0.839514	3.09371
AT1G02205	CER1	ECERIFERUM 1; Fatty acid hydroxylase superfamily; Very-long-chain aldehyde decarbonylase CER1	6.19142	5.67909	6.82113	5.48945	5.36029	6.39173	7.61446	7.22182	7.76301		78.1305	55.6563	186.487	0.71235	2.38686
AT1G03300	ATDUF1	agenet domain protein (DOMAIN OF UNKNOWN FUNCTION 724 1); DUF724 domain-containing protein 1	6.23095	5.352	6.02332	5.92295	5.4946	5.68653	7.08463	6.35093	7.24194		59.3321	51.4195	121.909	0.866638	2.0547
AT1G03410	2A6	2-oxoglutarate (2OG) and Fe(II)-dependent oxygenase superfamily protein; 1-aminocyclopropane-1-carboxylate oxidase homolog 5	5.34318	5.44098	5.95726	4.82526	5.73068	6.58481	6.94313	7.14833	7.15508		47.7221	58.1469	134.813	1.21845	2.82496
AT1G05490	CHR31/CLSY3	chromatin remodeling 31; SNF2 domain-containing protein CLASSY 3	2.01638	2.82028	1.96755	2.36286	2.32418	1.76757	5.19632	4.70162	3.14772		4.00656	3.51883	22.8495	0.878266	5.70302
AT1G06080	ADS1	delta 9 desaturase 1; delta-9 acyl-lipid desaturase 1	4.54442	4.92831	4.7655	4.59727	4.46211	3.40861	5.71467	5.35222	6.16516		25.9943	17.9553	54.0424	0.690739	2.07901
AT1G06160	ORA59/ERF094	octadecanoid-responsive AP2/ERF 59; Ethylene-responsive transcription factor ERF094	4.60585	4.2622	3.81759	4.06581	4.3246	4.42229	5.34438	6.98906	6.20415		18.2129	18.4082	79.4631	1.01072	4.36301
AT1G06520	GPAT1	glycerol-3-phosphate acyltransferase 1	4.48024	4.50166	4.31627	5.02208	4.64655	4.15653	5.57774	5.44721	6.70315		20.6316	24.1246	64.195	1.1693	3.11148
AT1G10640	AT1G10640	Pectin lyase-like superfamily protein	4.97529	5.604	4.418	4.69283	5.86074	4.50101	6.12829	6.39925	7.26056		32.8239	34.5392	101.564	1.05226	3.09422
AT1G12220	RPS5	RESISTANT TO P. SYRINGAE 5; Disease resistance protein (CC-NBS-LRR class) family	5.97564	5.70328	6.11706	6.09023	5.98005	6.47209	6.64484	6.98906	7.23255		60.48	72.3423	124.83	1.19614	2.06399
AT1G12240	ATBETAFRUCT4	Glycosyl hydrolases family 32 protein; Acid beta-fructofuranosidase 4, vacuolar; Vacuolar invertase 4	10.4904	9.66943	9.78158	10.4874	10.0783	10.0338	11.1794	10.4762	12.0289		1043.33	1187.33	2639.86	1.13802	2.53023
AT1G13400	NUB/JGL	Zinc finger protein NUBBIN; C2H2 and C2HC zinc fingers superfamily protein; Zinc finger protein JAGGED-like	0	2.15852	2.77021	1.80171	0	2.20389	4.07476	4.70162	3.97657		3.09554	2.03118	18.5382	0.656162	5.98867
AT1G13700	PGL1	6-phosphogluconolactonase 1	7.84825	7.31745	8.12414	7.70178	7.842	8.21914	9.04884	8.58744	9.35007		221.982	244.211	521.299	1.10013	2.34838
AT1G13710	CYP78A5	cytochrome P450, family 78, subfamily A, polypeptide 5	4.92796	4.50166	4.68615	3.65568	4.00263	3.23524	7.22117	6.24914	7.16499		25.2796	11.683	121.926	0.462151	4.82311
AT1G14250	APY5	GDA1/CD39 nucleoside phosphatase family protein; apyrase 5	4.92796	5.28947	3.6604	4.20197	5.46218	4.33903	5.60148	6.68564	6.99756		26.3986	26.5755	92.0916	1.0067	3.48851
AT1G14760	KNATM	KNOX Arabidopsis thaliana meinox; KNOX meinox protein, transcriptional regulator	1.59953	0	1.29603	0	0	1.13908	3.85532	3.98436	4.14632		1.16199	0.400801	15.0029	0.344927	12.9114
AT1G14790	RDR1	RNA-dependent RNA polymerase 1	5.23066	5.08378	4.51303	5.32021	4.70314	4.84073	6.35473	6.81	6.64767		30.4314	30.5521	97.1034	1.00397	3.1909
AT1G15380	GLYI4	glyoxylase I 4; Lactoylglutathione lyase / glyoxalase I family protein	8.16127	7.3561	7.91385	7.92974	7.36034	8.11662	8.62822	8.90723	9.60438		229.424	227.567	550.403	0.991907	2.39906
AT1G15790	AT1G15790	mediator of RNA polymerase II transcription subunit 15a-like protein	3.47926	3.89319	4.51303	3.55754	3.58754	3.8305	5.0313	5.06329	5.73035		15.2811	11.674	38.7421	0.763951	2.5353
AT1G16110	WAKL6	Wall-associated receptor kinase-like 6	5.80276	5.46946	6.147	5.48945	6.26956	6.28455	7.10138	7.12936	7.15508		55.9979	65.6757	138.95	1.17282	2.48135
AT1G17020	SRG1	senescence-related gene 1; Fe2OG dioxygenase domain containing protein	3.34156	3.80654	3.95932	3.83394	3.70303	3.7031	5.37225	5.35222	6.87002		12.2281	12.4359	65.4137	1.017	5.34946
AT1G17960	ThrRS	Threonyl-tRNA synthetase	5.19112	5.15565	4.84071	4.13549	4.52625	4.90003	7.10968	6.95714	6.74341		32.6111	22.492	122.169	0.689705	3.74626
AT1G19540	AT1G19540	NmrA-like negative transcriptional regulator family protein	5.74931	3.13673	4.418	4.78245	3.80996	4.25066	7.02442	7.46065	8.1894		26.988	19.1941	198.416	0.711207	7.35201
AT1G19610	PDF1.4/LCR78	defensin-like protein 19; Plant defensin 1.4; Low-molecular-weight cysteine-rich protein 78	2.60315	2.63153	3.04921	2.36286	3.80996	4.42229	6.74418	6.36721	7.23255		5.85018	12.5367	112.38	2.14296	19.2097
AT1G20350	TIM17-1	translocase inner membrane subunit 17-1; mitochondrial import inner membrane translocase subunit TIM17-1	2.82606	0.900058	1.29603	2.36286	1.58684	2.53844	4.67632	4.35481	4.56101		2.80433	3.65246	22.2116	1.30244	7.92047
AT1G20620	CAT3	catalase 3	12.6793	11.6921	11.9972	12.339	11.7751	12.0299	13.4361	14.8686	14.5334		4651.07	4288.14	21569.6	0.921968	4.63757
AT1G21410	SKP2A	F-box/RNI-like superfamily protein; F-box protein SKP2A	6.19142	6.15294	6.83959	5.90311	6.84828	7.29749	7.86061	7.51283	8.66505		85.2561	109.793	272.66	1.2878	3.19813
AT1G22890	AT1G22890	transmembrane protein	6.78978	5.94556	6.78351	6.62637	5.88541	6.77104	7.77967	7.6322	7.97509		93.1458	88.0416	222.251	0.945202	2.38605
AT1G23120	AT1G23120	Polyketide cyclase/dehydrase and lipid transport superfamily protein	4.26858	4.12571	4.98029	4.9848	3.90951	5.25831	5.81963	5.79899	6.35034		21.7655	27.3221	63.5818	1.2553	2.92122
AT1G23380	KNAT6	KNOTTED1-like homeobox gene 6; homeobox protein knotted-1-like 6	5.48073	5.52479	5.2245	5.68805	5.17266	4.77888	6.22317	6.23146	7.11472		41.6939	37.3588	95.1462	0.896025	2.28202
AT1G23935	AT1G23935	apoptosis inhibitory protein	4.19052	4.92831	4.68615	4.94654	4.90961	4.42229	6.16061	5.91432	5.59022		23.8171	26.4444	59.0072	1.11031	2.47751
AT1G23970	AT1G23970	Protein of unknown function (DUF626)	4.87903	4.70698	4.31627	4.38478	3.70303	4.05582	5.83973	5.47754	5.7828		24.1553	15.8484	51.2938	0.656104	2.1235
AT1G24625	ZFP7	zinc finger protein 7	5.92832	6.08093	6.44088	6.0547	6.49463	6.28455	6.73347	7.61184	7.22309		70.8221	77.2002	149.475	1.09006	2.11057
AT1G28230	PUP1	purine permease 1	5.10862	4.79962	5.77753	5.05841	5.7032	5.65244	6.34069	6.82187	6.87002		38.0689	44.24	102.717	1.1621	2.6982
AT1G28570	AT1G28570	SGNH hydrolase-type esterase superfamily protein; GDSL esterase/lipase; Extracellular lipase	4.82838	4.92831	5.04533	4.38478	4.95692	4.50101	6.67872	6.81	7.49083		29.627	23.8641	130.508	0.805484	4.40504
AT1G28580	AT1G28580	GDSL-like Lipase/Acylhydrolase superfamily protein; Extracellular lipase	8.81941	8.63551	9.20931	8.94872	8.88239	9.32075	9.84977	9.8561	10.1387		479.463	534.171	991.277	1.1141	2.06747
AT1G30040	GA2OX2	gibberellin 2-oxidase; Gibberellin 2-beta-dioxygenase 2; Gibberellin 2-beta-hydroxylase 2	5.10862	4.3259	4.51303	5.66467	4.17258	4.33903	5.75757	6.46125	7.12492		24.7967	28.666	92.9297	1.15604	3.74766
AT1G30160	AT1G30160	Protein of unknown function (DUF295)	1.01094	2.15852	1.29603	0	1.58684	0	4.84495	4.75211	5.22359		1.97843	0.667966	30.0171	0.337624	15.1722
AT1G30220	INT2	inositol transporter 2	3.34156	2.41433	3.2829	3.45224	3.32446	4.42229	4.8046	4.70162	6.01977		7.40026	13.1346	38.617	1.77488	5.21833
AT1G30500	NF-YA7	nuclear transcription factor Y, subunit A7	4.7214	4.44542	5.04533	4.94654	4.25059	4.71427	6.04415	5.95799	6.56022		26.0631	24.3738	73.1732	0.935185	2.80754
AT1G31040	ORE15/PLATZ3	PLATZ transcription factor family protein; ORESARA15	3.92724	3.13673	3.48396	3.55754	1.00141	2.80983	4.43338	4.84807	5.67592		10.7323	5.92935	32.8438	0.552475	3.06027
AT1G31290	AGO3	ARGONAUTE 3	4.19052	3.80654	4.7655	3.65568	3.32446	4.64663	5.83973	5.56486	5.61935		18.8167	14.8895	50.2549	0.79129	2.67076
AT1G31310	AT1G31310	hydroxyproline-rich glycoprotein family protein	4.02044	4.19557	3.2829	2.93172	3.32446	3.40861	5.06585	4.75211	5.61935		13.7614	8.42232	35.5335	0.612025	2.58211
AT1G31820	PUT1	Polyamine Uptake Transporter 1; Amino acid permease family protein	4.26858	4.50166	5.65786	4.64584	5.46218	5.50744	6.56256	6.39925	6.96388		29.805	37.2024	100.253	1.24819	3.36364
AT1G34060	TAR4	Tryptophan aminotransferase-related protein 4; Pyridoxal phosphate (PLP)-dependent transferases superfamily protein	2.01638	2.82028	1.29603	2.57837	3.70303	2.53844	4.95962	5.35222	5.73035		3.52139	7.26855	40.685	2.06412	11.5537
AT1G34180	NAC016	NAC domain containing protein 16, transcriptional activator	3.47926	2.82028	3.2829	3.55754	2.80976	3.8305	5.06585	4.64931	5.02015		8.3161	10.0041	29.3464	1.20298	3.52887
AT1G34315	AT1G34315	transmembrane protein	5.60631	5.12017	4.98029	5.16223	5.00272	4.77888	6.53816	7.07089	6.68948		37.3536	30.7739	109.199	0.823855	2.92337
AT1G34460	CYCB1;5	CYCLIN B1;5	3.47926	3.27223	3.2829	2.36286	2.32418	1.76757	4.99591	6.15847	5.59022		9.18224	3.51883	49.505	0.383221	5.39138
AT1G36060	ERF055/TG/WIND3	AP2/ERF transcription factor family, ERF subfamily; Translucent Green; Integrase-type DNA-binding superfamily protein	6.60653	6.46728	7.65722	6.15878	7.00279	7.84962	9.05959	8.00435	8.81425		128.262	142.451	412.504	1.11062	3.21609
AT1G36180	ACC2	acetyl-CoA carboxylase 2	6.30692	6.27091	6.26091	6.4044	6.64664	6.45241	8.57824	8.37836	7.86992		76.6931	89.8241	315.302	1.17121	4.11122
AT1G44350	ILL6	IAA-leucine resistant (ILR)-like gene 6; IAA-amino acid hydrolase ILR1-like 6; jasmonoyl-L-amino acid hydrolase	6.21132	4.75404	5.81531	6.15878	6.23159	5.65244	8.13324	7.86793	8.62252		51.4633	64.6295	301.834	1.25584	5.86504
AT1G45229	AT1G45229	transmembrane protein	4.34264	3.89319	4.08837	3.65568	4.39499	4.50101	5.50407	5.31911	5.4991		16.386	17.7617	42.5105	1.08395	2.59431
AT1G47960	C/VIF1	cell wall / vacuolar inhibitor of fructosidase 1; cell wall/vacuolar invertase	5.60631	5.57808	6.147	6.24012	5.39506	5.68653	6.47529	6.90231	7.79528		54.7839	55.3902	142.575	1.01107	2.6025
AT1G47990	GA2OX4	gibberellin 2-oxidase 4; gibberellin 2-beta-dioxygenase 4	3.01909	0.900058	1.96755	1.80171	1.58684	2.53844	4.14106	3.70568	4.73082		3.62791	3.09994	18.0813	0.854472	4.98396
AT1G50970	AT1G50970	Membrane trafficking VPS53 family protein; Vacuolar protein sorting-associated protein 53 B	5.54489	5.44098	6.147	5.54172	6.04716	5.98925	6.76536	6.8569	7.315		52.6635	57.7448	126.978	1.09648	2.41111
AT1G51140	FBH3/bHLH122/AKS1	FLOWERING BHLH 3; ABA-RESPONSIVE KINASE SUBSTRATE 1; basic helix-loop-helix (bHLH) DNA-binding superfamily protein	6.46449	5.79615	5.10756	5.6409	6.02513	5.54508	6.70087	6.76154	7.96945		58.4509	52.9046	153.389	0.905111	2.62423
AT1G52000	JAL5	Jacalin-related lectin 5; mannose-binding lectin superfamily protein	5.34318	4.19557	3.04921	3.55754	4.3246	3.7031	7.38746	7.77333	8.81425		21.398	13.945	277.787	0.651698	12.9819
AT1G52030	MBP2/JAL6	myrosinase-binding protein 2; jacalin-related lectin 6	3.18931	1.84736	0	1.4101	2.32418	0	4.72036	4.59502	5.36791		3.5734	1.88845	29.6083	0.528475	8.28576
AT1G52400	BGLU18	beta glucosidase 18; abscisic acid glucose ester beta-glucosidase activity	7.95834	7.49418	7.10663	6.91102	6.70322	6.14444	8.56321	8.40621	9.11459		187.941	97.4279	422.943	0.518396	2.2504
AT1G52410	TSA1	TSK-associating protein 1	5.4136	5.72706	4.68615	5.28997	5.32467	4.15653	7.65474	7.49811	8.04118		39.4454	31.3444	214.236	0.794628	5.43121
AT1G53780	RPT1B	26S proteasome regulatory complex ATPase; 26S proteasome regulatory subunit 7 homolog B	9.41408	8.87789	9.43236	9.30309	8.98865	9.66857	9.99578	10.369	10.4788		613.525	650.169	1255.86	1.05973	2.04695
AT1G54020	AT1G54020	GDSL-like Lipase/Acylhydrolase superfamily protein; Extracellular lipase	1.01094	1.45011	1.29603	0	0	1.13908	2.52489	3.48464	4.22425		1.40101	0.400801	10.88	0.286081	7.76581
AT1G54680	AT1G54680	translation initiation factor 3 subunit I	4.82838	4.84381	4.68615	4.82526	5.28814	5.54508	6.0784	5.84623	6.10464		26.6238	37.0383	63.6393	1.39118	2.39032
AT1G55200	AT1G55200	kinase with adenine nucleotide alpha hydrolases-like domain-containing protein	5.10862	5.00814	4.08837	4.13549	4.17258	4.95699	6.14454	6.02111	5.9296		26.898	21.2229	64.5465	0.789014	2.39967
AT1G56280	DI19/DI19-1	drought-induced 19	10.775	9.96529	10.682	10.4043	10.4437	10.861	11.4546	12.0056	12.171		1463.91	1534.95	3842.31	1.04852	2.62468
AT1G58340	ZF14/DTX48/ABS4/BCD1	MATE efflux family protein; Protein DETOXIFICATION 48; ABNORMAL SHOOT 4; BUSH-AND-CHLOROTIC-DWARF 1	5.44756	4.19557	5.52735	4.78245	4.3246	5.16469	6.50077	6.33445	6.67568		35.0277	26.8092	90.1618	0.76537	2.57402
AT1G60060	AT1G60060	Serine/threonine-protein kinase WNK (With No Lysine)-like protein	5.15046	3.80654	3.2829	3.55754	3.00246	3.8305	6.23839	5.31911	5.97539		18.7476	10.338	58.4463	0.551434	3.11754
AT1G60260	BGLU5	beta glucosidase 5	6.46449	5.96569	6.31466	6.60196	6.46221	5.98925	7.69392	8.97522	8.59344		75.801	81.9441	364.535	1.08104	4.80911
AT1G61610	AT1G61610	S-locus lectin protein kinase family protein; Putative G-type lectin S-receptor-like serine/threonine-protein kinase	1.01094	1.45011	1.29603	1.80171	2.5873	1.76757	3.85532	3.80468	4.88273		1.40101	3.30029	18.3163	2.35566	13.0737
AT1G61810	BGLU45	beta-glucosidase 45	4.41308	2.63153	4.31627	3.65568	2.80976	4.57565	5.52905	4.93805	7.315		14.8077	13.4867	77.6879	0.910794	5.24646
AT1G62290	APA2	Saposin-like aspartyl protease family protein; Aspartic proteinase A2	3.92724	3.27223	3.95932	3.21533	3.70303	4.33903	5.3996	5.38459	5.33316		12.4766	13.1832	40.4335	1.05664	3.24076
AT1G62360	STM	SHOOT MERISTEMLESS; KNOX/ELK homeobox transcription factor; Homeobox protein SHOOT MERISTEMLESS	3.47926	4.70698	3.95932	2.10939	4.09011	3.8305	6.46238	6.83364	7.07321		16.6085	10.8576	111.301	0.653736	6.70145
AT1G62500	DEG27	Bifunctional inhibitor/lipid-transfer protein/seed storage 2S albumin superfamily protein, PEARLI1 subfamily	6.37908	6.15294	5.95726	4.94654	4.70314	5.21226	7.14242	6.30093	7.7499		71.174	30.3189	144.126	0.425983	2.02499
AT1G62510	AT1G62510	Bifunctional inhibitor/lipid-transfer protein/seed storage 2S albumin superfamily protein	7.95834	7.09786	8.03087	6.98839	7.97434	8.1778	10.5212	7.46065	10.8087		214.745	221.679	1145.47	1.03229	5.33407
AT1G62540	FMO GS-OX2	flavin-monooxygenase glucosinolate S-oxygenase 2	3.47926	3.89319	2.42399	3.91544	4.64655	3.94756	5.28697	4.98101	6.29724		9.459	17.5216	48.7555	1.85237	5.1544
AT1G64360	AT1G64360	hypothetical protein	6.02146	4.75404	4.7655	5.71106	5.28814	4.05582	6.14454	7.61184	7.19433		38.7141	35.0298	136.604	0.904832	3.52852
AT1G64620	DOF1.8	Dof-type zinc finger DNA-binding family protein	5.30664	4.50166	4.418	4.59727	3.80996	4.33903	5.85956	6.46125	6.66174		26.8697	18.4898	81.474	0.688129	3.03219
AT1G64660	MGL	methionine gamma-lyase	7.09845	5.84044	7.39561	6.86046	6.28818	7.93715	8.56321	8.89885	9.8158		119.908	145.479	584.615	1.21326	4.87554
AT1G64970	G-TMT/VTE4	Tocopherol O-methyltransferase, chloroplastic; gamma-tocopherol methyltransferase; Vitamin E pathway gene 4 protein	6.19142	6.06235	6.17633	5.46259	6.66099	5.58176	7.80546	6.446	8.30599		69.7426	63.395	208.125	0.908985	2.98419
AT1G65370	AT1G65370	TRAF-like family protein	7.17139	6.86043	6.48843	6.55187	6.60269	6.09454	8.98709	8.92384	9.15246		115.71	85.4482	519.726	0.73847	4.49163
AT1G66760	DTX9	MATE efflux family protein; Protein DETOXIFICATION 9	7.51353	7.22859	7.66759	7.31557	7.58022	7.79599	9.10598	9.17347	10.3082		177.673	189.969	797.765	1.06921	4.49009
AT1G66860	AT1G66860	Class I glutamine amidotransferase-like superfamily protein	1.01094	0.900058	0	0	0	0	1.37022	4.53861	3.43672		0.627121	0	11.2181	0	17.8883
AT1G67220	HAC2	histone acetyltransferase of the CBP family 2	1.01094	0.900058	0	0.870878	1.00141	0	3.39377	2.71376	3.56206		0.627121	0.610242	8.62728	0.973085	13.757
AT1G67300	AT1G67300	Major facilitator superfamily protein; Probable plastidic glucose transporter 2	6.81601	6.33423	6.62234	7.02557	6.70322	6.68936	7.33176	7.87933	7.6546		96.293	111.565	198.349	1.1586	2.05985
AT1G67860	AT1G67860	transmembrane protein	6.84178	5.57808	6.92846	6.83974	6.00277	5.65244	7.20576	7.77333	8.62252		93.7614	75.3212	252.509	0.803328	2.6931
AT1G68320	MYB62	myb domain protein 62; transcription factor (repressor) MYB62	1.59953	1.84736	0	1.4101	2.80976	0	4.07476	4.35481	4.43557		1.54295	2.55642	18.6504	1.65683	12.0874
AT1G68800	TCP12/BRC2	TCP domain protein 12; transcription factor TCP12; Branched 2	0	0	0	0	0	0	4.26518	5.21498	4.97578		0	0	28.2793
AT1G69252	AT1G69252	non coding RNA	6.80296	6.89233	7.39561	6.67399	7.00279	6.93596	7.64335	7.74244	8.71315		131.946	116.6	276.918	0.883695	2.09872
AT1G69310	WRKY57	WRKY DNA-binding protein 57; WRKY transcription factor 57	5.48073	6.90281	7.09131	6.07258	7.2412	6.99155	7.69392	8.27424	8.36739		99.2263	114.282	281.301	1.15173	2.83494
AT1G69480	PHO1-H10	Phosphate transporter PHO1 homolog 10; EXS (ERD1/XPR1/SYG1) family protein	3.47926	4.44542	3.2829	3.08048	4.86069	4.25066	5.93625	4.14412	7.38453		13.2242	17.8499	81.0035	1.34978	6.12538
AT1G70510	KNAT2	KNOTTED-like from Arabidopsis thaliana 2; Homeobox knotted-like protein; Homeobox protein knotted-1-like 2	1.01094	2.82028	1.96755	1.4101	2.32418	2.20389	3.15793	4.80089	5.14562		3.32975	3.09085	23.0663	0.928254	6.92734
AT1G70700	TIFY7/JAZ9	TIFY domain/Divergent CCT motif family protein; Jasmonate ZIM domain-containing protein 9	8.71871	8.34786	7.83327	8.44401	9.19263	8.20745	9.97775	10.4696	10.7719		324.055	408.661	1390.57	1.26108	4.29117
AT1G71050	HIPP20	heavy metal associated isoprenylated plant protein 20; Heavy metal transport/detoxification superfamily protein	4.41308	3.27223	4.20681	3.91544	3.80996	4.42229	4.8046	5.91432	5.64791		15.4773	15.8518	45.1324	1.02419	2.91603
AT1G71280	RH55	DEA(D/H)-box RNA helicase family protein; DEAD-box ATP-dependent RNA helicase 55	1.01094	1.45011	0	0.870878	1.00141	0	3.68798	3.07274	3.78415		0.915834	0.610242	10.6929	0.666323	11.6755
AT1G72060	AT1G72060	serine-type endopeptidase inhibitor	6.57615	5.65449	5.10756	7.03472	6.28818	6.28455	8.30937	7.87364	8.92049		59.0875	94.7405	344.435	1.60339	5.82924
AT1G72450	JAZ6/TIFY11B	jasmonate-zim-domain protein 6; TIFY DOMAIN PROTEIN 11B	7.72905	7.73022	7.09131	7.35262	8.49466	7.56816	9.48517	9.45831	10.0371		185.956	236.972	822.59	1.27435	4.42358
AT1G72830	NF-YA3	nuclear transcription factor Y, subunit A3;transcriptional activator HAP2C	5.72182	5.86209	5.73873	5.48945	5.9335	6.16876	6.72269	6.93546	7.30607		53.7801	58.3279	127.756	1.08456	2.37552
AT1G73040	JAL19	Mannose-binding lectin superfamily protein; Jacalin-related lectin 19	0	1.45011	1.29603	0	0	1.13908	4.6309	3.22349	4.49965		1.0626	0.400801	17.9129	0.377189	16.8577
AT1G74290	AT1G74290	alpha/beta-Hydrolases superfamily protein	1.59953	3.3961	4.08837	2.93172	4.3246	4.05582	5.62484	5.02274	5.73035		9.18956	13.7662	43.981	1.49802	4.78598
AT1G74950	TIFY10B/JAZ2	TIFY domain/Divergent CCT motif family protein; Jasmonate ZIM domain-containing protein 2	7.50549	7.38629	7.26519	7.21453	7.86078	7.49312	7.99666	9.19416	8.4629		166.613	186.043	397.005	1.11662	2.3828
AT1G75240	HB33/ZHD5	homeobox protein 33; Zinc-finger homeodomain protein 5	7.70819	6.53622	6.78351	7.20646	5.9335	6.58481	8.36938	8.37836	8.4629		136.365	100.6	337.771	0.737726	2.47696
AT1G76960	AT1G76960	transmembrane protein	4.87903	3.89319	6.74487	4.78245	4.3246	6.11971	7.33884	7.76105	7.70982		49.5124	38.0316	195.056	0.768123	3.93955
AT1G77640	ERF013	Ethylene-responsive transcription factor ERF013; AP2/ERF transcription factor family, ERF subfamily; Integrase-type DNA-binding superfamily protein	5.34318	3.97493	4.20681	4.90723	3.70303	3.8305	6.56256	4.84807	7.03047		23.9281	18.0856	83.6846	0.755834	3.49734
AT1G78130	UNE2	Major facilitator superfamily protein; UNfertilized Embryo sac 2	5.57592	5.28947	5.38386	5.54172	5.25066	5.54508	6.16061	6.54954	6.92939		41.8549	42.782	94.6982	1.02215	2.26253
AT1G78490	CYP708A3	cytochrome P450, family 708, subfamily A, polypeptide 3	6.23095	6.39488	5.65786	5.71106	5.98005	5.42908	7.72668	7.74867	7.92929		68.9161	51.863	222.548	0.752553	3.22926
AT1G80160	GLYI7	glyoxylase I 7; Lactoylglutathione lyase / glyoxalase I family protein	4.48024	2.41433	4.31627	3.91544	2.80976	5.54508	5.93625	6.94634	8.2087		14.8574	21.9307	159.135	1.47609	10.7109
AT2G00340	AT2G00340	novel transcribed region	2.01638	2.41433	1.29603	2.10939	2.00211	3.56336	4.32345	4.59502	4.97578		2.94396	5.71419	24.2188	1.94099	8.2266
AT2G01008	AT2G01008	maternal effect embryo arrest protein	3.01909	3.51016	2.77021	4.54701	4.39499	4.84073	5.37225	5.06329	5.0632		7.7741	23.3571	35.096	3.00447	4.51447
AT2G01010	AT2G01010	rRNA, small ribosomal subunit	4.60585	4.50166	4.91219	5.19524	5.13201	5.21226	6.3122	5.6472	5.8823		24.7046	35.2586	61.8548	1.4272	2.50377
AT2G01020	AT2G01020	5.8SrRNA	2.01638	1.84736	3.81759	3.08048	3.32446	4.84073	6.23839	5.31911	5.40185		6.24791	14.7106	51.5666	2.35448	8.25342
AT2G01940	SGR5/IDD15	SHOOT GRAVITROPISM 5; C2H2-like zinc finger protein; Zinc finger protein SHOOT GRAVITROPISM 5	4.87903	4.84381	5.10756	5.32021	4.90961	4.05582	6.14454	6.30093	6.22325		29.8732	27.8801	73.7665	0.93328	2.46932
AT2G04080	DTX2	MATE efflux family protein; Multidrug and toxic compound extrusion (MATE) protein 2; Protein DETOXIFICATION 2	5.26915	5.49739	5.10756	4.49494	5.04712	4.84073	6.43621	6.82187	6.33285		38.4044	27.0886	92.4453	0.705351	2.40715
AT2G04230	AT2G04230	FBD, F-box and Leucine Rich Repeat domains containing protein	5.95218	6.50904	5.88803	6.36142	6.37782	6.60277	7.01561	7.27459	7.25128		69.7375	86.524	144.527	1.24071	2.07244
AT2G06050	OPR3	oxophytodienoate-reductase 3	7.24082	7.16035	6.55694	7.13169	7.39511	6.89282	8.35897	9.29551	8.52196		128.484	141.465	440.433	1.10103	3.42791
AT2G07042	AT2G07042	non-coding RNA	4.10798	4.05229	4.7655	3.45224	4.39499	4.90003	5.83973	5.35222	6.06283		19.3445	19.614	53.9895	1.01393	2.79095
AT2G16005	ROSY1	INTERACTOR OF SYNAPTOTAGMIN1; MD-2-related lipid recognition domain-containing protein	1.01094	0	1.29603	2.10939	0	0	5.42643	2.23477	5.105		0.823579	1.10503	26.3759	1.34175	32.0259
AT2G18050	HIS1-3	histone H1-3	4.97529	1.84736	5.69886	3.74756	4.70314	6.09454	7.70492	9.69929	10.3226		27.9994	34.9383	772.537	1.24782	27.5912
AT2G19900	NADP-ME1	NADP-malic enzyme 1	1.01094	1.84736	2.42399	2.36286	1.58684	3.56336	4.53551	2.49405	6.41823		2.66006	5.65646	37.1157	2.12644	13.9529
AT2G19910	RDR3	RNA-dependent RNA polymerase family protein; RNA-dependent RNA polymerase 3	4.26858	4.12571	3.2829	2.57837	3.70303	3.03816	5.62484	5.59283	5.435		14.4879	8.07015	45.9563	0.557026	3.17205
AT2G19920	RDR4	RNA-dependent RNA polymerase family protein; RNA-dependent RNA polymerase 4	4.10798	3.51016	3.2829	1.80171	2.32418	3.23524	5.16479	4.80089	4.97578		11.7901	4.97031	30.7381	0.421566	2.60711
AT2G21185	AT2G21185	transmembrane protein	4.97529	5.49739	5.77753	4.44091	5.42901	4.95699	6.46238	5.84623	6.87002		42.828	30.9538	86.5607	0.722747	2.02113
AT2G21235	AT2G21235	Basic-leucine zipper (bZIP) transcription factor family protein	0	0.900058	1.29603	0	0	1.76757	3.15793	2.71376	4.22425		0.773886	0.801602	10.3922	1.03581	13.4285
AT2G21730	CAD2	cinnamyl alcohol dehydrogenase homolog 2	2.33939	0.900058	2.77021	0.870878	0	0	3.39377	2.71376	4.36851		3.58303	0.276258	11.5757	0.0771019	3.23071
AT2G22420	PER17/PRX17	Peroxidase superfamily protein; peroxidase 17	5.66522	5.41193	5.52735	5.92295	5.09019	5.54508	6.50077	6.30093	6.97519		45.4805	46.1425	97.4066	1.01455	2.14172
AT2G22980	SCPL13	serine carboxypeptidase-like 13; sinapoylglucose--sinapoylglucose acyltransferase	7.31628	6.23818	7.65722	7.47191	6.60269	7.57727	9.18078	8.71382	9.58051		144.575	154.232	587.62	1.0668	4.06447
AT2G23010	SCPL9	serine carboxypeptidase-like 9; sinapoylglucose--sinapoylglucose acyltransferase	3.47926	4.50166	2.42399	3.55754	3.58754	3.40861	5.28697	5.93632	5.67592		12.0574	10.4716	49.4675	0.868475	4.10266
AT2G23130	AGP17	Lys-rich arabinogalactan protein 17	8.20659	7.28576	7.43255	7.92483	7.81658	7.01856	9.60893	7.83903	9.58421		207.068	198.365	591.479	0.957972	2.85644
AT2G24255	AT2G24255	LOW protein: F-box/kelch-repeat protein	0	0	1.29603	0.870878	0	0	3.68798	3.59939	2.56415		0.485172	0.276258	9.30763	0.569403	19.1842
AT2G24270	ALDH11A3	aldehyde dehydrogenase 11A3; NADP-dependent glyceraldehyde-3-phosphate dehydrogenase	10.7377	10.6762	10.8642	10.344	10.9239	10.7262	11.8625	10.8789	12.2981		1734.97	1644.48	3546.57	0.947844	2.04417
AT2G24280	AT2G24280	alpha/beta-Hydrolases superfamily protein	8.17146	8.57781	8.76884	8.17699	8.73412	8.90917	9.49629	9.39418	10.073		367.87	397.666	823.09	1.081	2.23745
AT2G24700	REM10	Transcriptional factor B3 family protein; REPRODUCTIVE MERISTEM 10; B3 domain-containing protein REM10	4.60585	4.12571	4.418	3.55754	4.00263	4.25066	5.50407	6.10119	5.56048		20.0613	14.6131	52.7418	0.728422	2.62903
AT2G25200	AT2G25200	Plant protein of unknown function (DUF868)	7.58392	6.25464	6.89357	7.5183	6.7307	7.34094	8.75802	8.45655	8.88194		128.038	149.552	417.669	1.16804	3.26208
AT2G28110	FRA8/IRX7	FRAGILE FIBER 8; IRREGULAR XYLEM 7; Exostosin family protein; Probable glucuronoxylan glucuronosyltransferase	6.62148	5.32107	6.53446	6.45978	6.13205	6.67245	7.5549	6.92449	8.38021		76.045	85.7192	213.235	1.12722	2.80407
AT2G28120	OTU1	OVARIAN TUMOR DOMAIN (OTU)-CONTAINING DUB (DEUBIQUITILATING ENZYME) 1; Major facilitator superfamily protein;	7.25047	6.23818	6.28803	7.43784	7.0796	7.48346	8.64546	8.16669	8.78241		100.966	161.534	375.039	1.59988	3.71451
AT2G29450	GSTU5	glutathione S-transferase tau 5	9.10922	9.15276	9.13655	8.85629	9.47651	9.29059	9.88768	9.92373	10.5628		560.428	599.697	1142.71	1.07007	2.03901
AT2G31110	TBL40	trichome birefringence-like protein (DUF828); Protein trichome birefringence-like 40	6.63628	5.92514	5.69886	6.41844	6.37782	5.25831	7.4078	6.86838	7.81431		69.7277	67.9898	169.578	0.975075	2.432
AT2G31160	LSH3/OBO1	LIGHT SENSITIVE HYPOCOTYLS 3; LIGHT-DEPENDENT SHORT HYPOCOTYLS 3 (DUF640); ORGAN BOUNDARY 1	4.41308	4.50166	4.51303	3.08048	4.17258	4.42229	5.42643	5.6472	6.1251		21.2636	14.9777	53.306	0.704381	2.50692
AT2G33060	RLP27	receptor like protein 27	4.48024	5.08378	5.85213	4.82526	5.00272	5.84581	7.05053	6.82187	7.11472		36.9994	38.3076	127.097	1.03536	3.4351
AT2G33810	SPL3	squamosa promoter binding protein-like 3	4.7214	3.61587	3.95932	4.59727	3.70303	3.94756	5.19632	6.08159	5.53012		17.0652	16.5526	49.1992	0.969966	2.88302
AT2G34490	CYP710A2	cytochrome P450, family 710, subfamily A, polypeptide 2; C-22 sterol desaturase	4.26858	5.32107	4.7655	3.33864	4.75759	3.23524	6.72269	6.71139	6.80811		27.8165	14.528	106.489	0.52228	3.82826
AT2G34600	JAZ7/TIFY5B	jasmonate-zim-domain protein 7	3.47926	3.71435	3.04921	3.55754	5.46218	3.94756	5.9548	7.35845	6.63346		9.85192	22.7622	107.47	2.31044	10.9085
AT2G35950	EDA12	embryo sac development arrest 12	2.60315	0.900058	2.77021	0	2.5873	1.76757	4.53551	4.64931	6.66174		3.92144	2.47152	48.8444	0.630258	12.4557
AT2G38240	JOX4	Jasmonic acid oxidase 4; Jasmonate-induced oxygenase 4; 2-oxoglutarate (2OG) and Fe(II)-dependent oxygenase superfamily protein	1.01094	0	0	0	1.58684	1.76757	4.72036	4.41871	6.57517		0.338407	1.46957	46.6999	4.3426	137.999
AT2G38250	GT-3B	Trihelix transcription factor GT-3b; Trihelix DNA-binding protein GT-3b; Transcription factor GT-1-like; Homeodomain-like superfamily protein	3.18931	2.98716	3.81759	2.76584	4.39499	3.03816	6.06138	5.02274	5.80833		9.38351	11.0183	50.7758	1.17422	5.41117
AT2G38530	LTP2	non-pecific lipid transfer protein 2	7.06602	7.98819	7.73813	6.62637	6.88543	7.34094	8.82005	8.06552	9.83456		199.471	125.382	543.302	0.628572	2.72372
AT2G39030	NATA1	N-acetyltransferase activity 1; L-ornithine N5-acetyltransferase NATA1; Acyl-CoA N-acyltransferases (NAT) superfamily protein	0	0.900058	0	0	0	0	3.15793	2.71376	5.56048		0.288714	0	19.8927	0	68.9012
AT2G39330	JAL23	jacalin-related lectin 23; Myrosinase-binding protein-like	1.01094	1.45011	0	0	0	0	3.68798	3.48464	3.29944		0.915834	0	10.3091	0	11.2566
AT2G39800	P5CS1	delta1-pyrroline-5-carboxylate synthase 1	9.24093	9.10817	10.0878	9.01493	10.1295	9.53699	11.4542	10.1203	12.7378		747.398	792.462	3582.16	1.0603	4.79284
AT2G40955	AT2G40955	hypothetical protein	1.01094	0.900058	1.29603	1.4101	0	1.13908	3.59642	3.80468	3.78415		1.11229	0.953317	12.2821	0.857074	11.0421
AT2G41510	CKX1	cytokinin oxidase/dehydrogenase 1	2.82606	4.05229	3.04921	2.76584	3.00246	2.80983	5.22717	4.28794	6.74341		9.65315	6.27569	53.7119	0.650119	5.56418
AT2G43510	TI1	trypsin inhibitor protein 1; Defensin-like protein 195	6.15077	4.96878	6.05524	5.09386	5.83565	5.98925	7.13431	6.43058	8.04655		55.2878	50.595	162.714	0.915121	2.94303
AT2G46510	AIB/bHLH17	ABA-inducible bHLH-type transcription factor	6.37908	6.36487	6.02332	6.56455	6.42904	6.34981	6.91498	7.59119	7.48293		75.8976	86.4594	163.132	1.13916	2.14936
AT2G46680	HB-7	homeobox 7; homeobox-leucine zipper protein ATHB-7; homeodomain transcription factor ATHB-7	6.63628	6.5227	7.30557	6.0547	6.87315	6.67245	7.87042	7.17633	9.16239		115.539	94.2337	316.216	0.815601	2.73688
AT2G46880	PAP14	purple acid phosphatase 14	1.01094	0	0	0	0	0	3.49865	3.35997	3.29944		0.338407	0	9.47187	0	27.9896
AT2G47440	AT2G47440	Tetratricopeptide repeat (TPR)-like superfamily protein	8.76321	8.04607	7.71832	8.27288	8.11654	6.84835	9.83982	9.03251	10.2098		302.134	233.024	873.79	0.77126	2.89207
AT2G47780	AT2G47780	Rubber elongation factor protein (REF); REF/SRPP-like protein	2.60315	0.900058	0	2.36286	1.00141	0	4.14106	4.41871	4.97578		1.98075	1.71527	22.4995	0.865973	11.3591
AT3G01345	AT3G01345	Expressed protein	1.01094	1.45011	1.96755	1.80171	2.5873	1.13908	4.67632	4.21782	4.93		1.88618	2.89949	23.887	1.53723	12.6642
AT3G05690	NF-YA2/UNE8	nuclear transcription factor Y, subunit A2; Transcriptional activator HAP2B; UNFERTILIZED EMBRYO SAC 8	5.37882	6.27091	5.38386	4.9848	6.11129	5.01178	7.03318	6.95714	7.90583		52.5279	43.3532	164.018	0.825337	3.1225
AT3G05936	AT3G05936	hypothetical protein	4.34264	4.65832	5.57218	4.20197	5.17266	5.65244	6.47529	6.31779	6.46713		30.0392	33.9237	84.7381	1.12931	2.82092
AT3G06345	MIR5642a	microRNA ath-MIR5642a precursor	5.19112	5.04646	5.16721	5.51582	5.25066	5.61754	5.93625	6.26661	6.75658
AT3G07540	FH10	Actin-binding FH2 (formin homology 2) family protein; Formin-like protein 10	7.08772	6.5227	6.08648	6.91102	6.49463	6.14444	8.14541	7.73618	8.08883		97.641	92.7521	255.207	0.949931	2.61373
AT3G07550	FBL12	RNI-like superfamily protein; F-box/LRR-repeat protein 12	5.54489	5.67909	5.73873	6.07258	5.75765	5.90491	7.04188	6.57781	7.35019		49.4399	59.441	129.153	1.20229	2.61233
AT3G08860	PYD4	PYRIMIDINE 4; Alanine--glyoxylate aminotransferase 2 homolog 3, mitochondrial	5.4136	4.3259	3.95932	4.38478	4.17258	3.8305	6.8068	7.22182	7.58983		25.0781	16.7167	150.293	0.666586	5.99301
AT3G10450	SCPL7	serine carboxypeptidase-like 7	6.2883	5.98555	6.83959	5.68805	6.2507	7.3516	8.28392	8.13375	9.12224		84.3497	96.0086	382.274	1.13822	4.53201
AT3G10870	MES17	methyl esterase 17; Methyl indole-3-acetic acid esterase	5.26915	5.44098	4.51303	4.73834	5.42901	4.57565	6.38241	6.49129	6.57517		33.9456	30.2065	88.58	0.88985	2.60947
AT3G12580	HSP70-4	heat shock protein 70-4	6.69401	5.81847	6.147	6.4044	5.83565	5.01178	8.18916	6.19542	8.89391		75.945	57.026	279.283	0.750885	3.67744
AT3G13061	AT3G13061	Natural antisense transcript overlaps with AT3G13060	5.23066	4.65832	5.65786	4.59727	5.55734	6.04286	8.59312	6.71139	8.73328		36.7625	44.7417	304.516	1.21705	8.28333
AT3G13062	AT3G13062	Polyketide cyclase/dehydrase and lipid transport superfamily protein	9.06067	8.64802	9.33818	9.36061	9.09292	9.55324	10.4445	9.63852	10.8228		526.466	650.583	1332.97	1.23576	2.53192
AT3G13277	AT3G13277	noncoding RNA	4.92796	3.61587	4.84071	4.82526	4.00263	5.01178	6.14454	6.39925	6.56022		22.7854	24.5471	82.1721	1.07732	3.60635
AT3G13672	SINAT6/SINA2	TRAF-like superfamily protein; Probable inactive E3 ubiquitin-protein ligase SINAT6; Protein SEVEN IN ABSENTIA 2; Seven in absentia homolog 6	4.34264	3.61587	3.6604	4.13549	3.17242	3.7031	5.37225	5.06329	5.90614		14.0644	12.205	43.9413	0.867797	3.1243
AT3G13810	IDD11	indeterminate(ID)-domain 11; probable Zinc finger transcription factor	6.30692	6.6772	6.60087	6.39021	6.60269	6.52955	7.71039	7.30872	8.14501		91.8582	90.1491	216.017	0.981394	2.35163
AT3G15790	MBD11	Methyl-CpG-binding domain-containing protein 11	6.60653	6.31866	6.31466	5.94253	6.34263	6.56662	7.30309	7.34206	7.80165		84.6209	78.148	180.096	0.923507	2.12827
AT3G16470	JR1/JAL35	JASMONATE RESPONSIVE 1; Jacalin-related lectin 35; Mannose-binding lectin superfamily protein	8.88593	8.70603	8.6692	8.29969	8.89459	8.79664	9.70385	9.58904	10.0235		431.594	410.905	880.654	0.952066	2.04047
AT3G17860	JAZ3/TIFY6B	jasmonate-zim-domain protein 3; JASMONATE-INSENSITIVE 3	6.66543	6.45309	6.05524	6.99777	6.9453	6.14444	7.36682	7.5561	8.01401		84.2064	106.26	202.917	1.2619	2.40976
AT3G18320	AT3G18320	F-box and associated interaction domains-containing protein	6.2883	5.19029	6.05524	7.06182	5.88541	7.04507	7.46716	7.2832	7.6686		59.3889	107.26	177.722	1.80605	2.99252
AT3G18550	BRC1/TCP18	BRANCHED 1; TCP family transcription factor; TEOSINTE BRANCHED 1-LIKE 1	2.01638	0	1.29603	1.4101	1.58684	1.76757	5.28697	4.75211	6.22325		1.50039	2.02208	45.9005	1.3477	30.5923
AT3G18610	NUC-L2	Nucleolin 2; NUCLEOLIN LIKE 2	1.59953	1.84736	1.96755	0.870878	1.58684	2.53844	5.34438	5.06329	5.36791		2.5133	2.54743	37.4526	1.01358	14.9018
AT3G21080	AT3G21080	ABC transporter-like protein	3.01909	2.41433	2.42399	3.55754	3.70303	3.03816	4.99591	4.35481	4.22425		5.26793	10.004	22.687	1.89903	4.30663
AT3G21090	ABCG15	ATP-binding cassette G15; ABC-2 type transporter family protein; ABC transporter G family member 15	5.02112	4.84381	5.38386	4.64584	4.86069	5.71982	8.04075	6.91344	8.38021		33.3143	34.5975	238.024	1.03852	7.1448
AT3G22460	OASA2	O-acetylserine (thiol) lyase (OAS-TL) isoform A2	5.8543	4.44542	5.65786	5.34983	5.39506	6.19267	6.53816	7.35028	7.56009		42.3758	51.0018	147.276	1.20356	3.47548
AT3G22565	AT3G22565	hypothetical protein	0	0	0	0	0	0	3.28066	2.23477	3.14772		0	0	6.76247
AT3G22740	HMT3	homocysteine S-methyltransferase 3	4.82838	4.3869	4.7655	4.49494	4.75759	4.15653	5.97312	6.89109	5.9296		24.5105	21.4775	79.8211	0.876257	3.25661
AT3G22860	TIF3C2	eukaryotic translation initiation factor 3 subunit C2	0	0	1.29603	1.4101	1.58684	0	4.43338	4.41871	4.29818		0.485172	1.22048	19.8892	2.51557	40.994
AT3G23240	ERF1/ERF1B	ethylene response factor 1; Ethylene-responsive transcription factor 1B	1.59953	0.900058	1.29603	0.870878	1.00141	0	2.31114	4.41871	3.88357		1.4507	0.610242	12.7033	0.420653	8.75667
AT3G23290	LSH4/OBO4	LIGHT SENSITIVE HYPOCOTYLS 4; ORGAN BOUNDARY 4; LIGHT-DEPENDENT SHORT HYPOCOTYLS-like protein (DUF640)	4.87903	4.96878	4.31627	4.06581	4.81006	4.33903	6.62181	6.69857	7.07321		25.8876	20.6793	111.337	0.798809	4.30079
AT3G24100	AT3G24100	Uncharacterized protein family SERF	6.57615	6.36487	7.29223	6.3468	6.67521	7.37268	8.85009	8.28286	8.52196		110.524	115.439	379.17	1.04447	3.43065
AT3G25760	AOC1	allene oxide cyclase 1, chloroplastic	8.15614	7.54859	7.60425	8.59697	8.76435	8.13525	9.25377	9.00675	9.32376		221.355	366.738	587.561	1.65678	2.65438
AT3G26170	CYP71B19	cytochrome P450, family 71, subfamily B, polypeptide 19	4.48024	3.27223	5.52735	3.83394	4.09011	4.33903	6.11185	6.39925	7.15508		25.034	16.1767	97.6964	0.646188	3.90254
AT3G26220	CYP71B3	cytochrome P450, family 71, subfamily B, polypeptide 3	6.41385	5.32107	6.46485	6.39021	6.3247	7.00512	7.80546	7.71725	8.27428		70.1902	96.4954	246.916	1.37477	3.51781
AT3G26230	CYP71B24	cytochrome P450, family 71, subfamily B, polypeptide 24	4.60585	5.57808	5.73873	4.94654	6.00277	5.96168	7.19799	6.94634	7.44274		40.8401	51.4271	147.044	1.25923	3.60047
AT3G26922	AT3G26922	F-box/RNI-like superfamily protein; F-box/LRR-repeat protein	4.41308	4.2622	3.95932	4.44091	4.58766	4.64663	5.67046	5.62027	5.9296		17.6828	22.6041	52.6905	1.27831	2.97975
AT3G27025	AT3G27025	hypothetical protein	0	0	0	0	1.00141	1.76757	4.8046	2.23477	6.90594		0	1.13558	49.8581
AT3G27710	ARI3	ARIADNE 3; RING/U-box superfamily protein; Probable E3 ubiquitin-protein ligase ARI3; RING-type E3 ubiquitin transferase ARI3; ariadne homolog 3	0	0	0	0	0	0	2.87585	2.90439	3.14772		0	0	6.89664
AT3G28100	UMAMIT45	Usually multiple acids move in and out Transporters 45; nodulin MtN21 /EamA-like transporter family protein; WAT1-related protein; Plant drug/metabolite exporter (P-DME) family	4.54442	5.22411	5.85213	4.9848	5.7032	5.46879	7.06768	7.21284	7.78246		38.4926	41.6835	166.555	1.0829	4.32692
AT3G28220	AT3G28220	TRAF-like family protein	6.51341	6.33423	5.81531	6.14195	7.02516	5.65244	8.0494	6.59174	9.14496		75.1164	82.7224	308.163	1.10126	4.10247
AT3G28500	RPP2C	60S acidic ribosomal protein family; 60S acidic ribosomal protein P2-3	1.01094	1.45011	0	1.4101	0	0	4.8046	3.98436	5.0632		0.915834	0.552517	24.7357	0.603293	27.0089
AT3G30340	UMAMIT32	Usually multiple acids move in and out Transporters 32; nodulin MtN21 /EamA-like transporter family protein; WAT1-related protein	3.60495	3.27223	3.48396	2.36286	3.70303	2.20389	4.84495	4.64931	5.61935		10.0058	6.59149	33.3306	0.658766	3.33112
AT3G32920	AT3G32920	DNA repair protein recA homolog 4; P-loop containing nucleoside triphosphate hydrolases superfamily protein; Recombinase A homolog 4	1.01094	0.900058	2.77021	1.4101	1.58684	3.03816	3.02377	5.21498	5.14562		2.56781	3.62529	25.8911	1.41182	10.083
AT3G44860	FAMT	farnesoic acid carboxyl-O-methyltransferase	3.01909	3.51016	2.77021	2.57837	4.09011	4.05582	5.34438	6.72409	6.83319		7.7741	12.2117	85.7901	1.57082	11.0354
AT3G45140	LOX2	lipoxygenase 2, chloroplastic	9.11979	8.55806	8.17588	9.11751	9.52048	8.22495	10.1795	9.80918	10.0167		406.474	528.691	1029.91	1.30067	2.53378
AT3G48280	CYP71A25	cytochrome P450, family 71, subfamily A, polypeptide 25	3.47926	4.3259	4.68615	3.45224	4.25059	4.77888	5.52905	6.50607	6.01977		17.9837	18.1444	66.3166	1.00894	3.68759
AT3G50410	OBP1	OBF binding protein 1; Dof zinc finger protein DOF3.4	4.87903	4.50166	4.31627	4.38478	4.3246	3.94756	5.75757	5.59283	5.8823		23.0005	17.7855	52.7831	0.773266	2.29487
AT3G50440	MES10	methyl esterase 10	6.13	5.90443	6.11706	6.36142	5.88541	5.71982	7.82576	8.40226	8.27428		65.4473	63.6788	290.602	0.972978	4.44024
AT3G50770	CML41	calmodulin-like 41; calcium-binding protein CML41; calcium-binding EF-hand family protein	3.18931	2.82028	4.7655	2.36286	1.00141	3.8305	4.9224	6.17706	5.80833		13.4613	6.12408	51.9064	0.454938	3.85596
AT3G51000	AT3G51000	alpha/beta-Hydrolases superfamily protein	8.11447	7.57505	7.80538	8.1975	8.03071	8.23073	8.54495	8.93207	9.29471		229.506	284.154	495.662	1.23811	2.15969
AT3G51860	CAX3	cation exchanger 3; vacuolar cation/proton exchanger 3; Ca(2+)/H(+) antiporter CAX3	5.74931	5.55168	6.11706	5.6409	5.75765	5.93358	7.26643	7.27459	7.9351		55.7021	54.0404	183.512	0.970168	3.29452
AT3G52535	AT3G52535	Natural antisense transcript overlaps with AT3G52540	4.97529	5.25716	5.33267	5.37886	5.39506	5.65244	6.0784	6.21355	6.58996		35.6665	43.6628	78.3726	1.22419	2.19737
AT3G53210	UMAMIT6	Usually multiple acids move in and out Transporters 6; nodulin MtN21 /EamA-like transporter family protein; WAT1-related protein	4.26858	4.05229	3.81759	4.86683	4.95692	4.05582	6.16061	5.62027	6.73012		15.6547	24.6227	74.6291	1.57286	4.76719
AT3G55290	SDRD	NAD(P)-binding Rossmann-fold superfamily protein; SHORT-CHAIN DEHYDROGENASE/REDUCTASE ISOFORM D	3.34156	4.19557	4.418	3.45224	4.3246	4.15653	5.50407	5.41624	6.35034		15.6123	15.272	55.5586	0.9782	3.55863
AT3G55970	JRG21/JOX3	jasmonate-regulated gene 21; Jasmonic oxidase 3; Jasmonate-induced oxygenase 3; Fe2OG dioxygenase	2.01638	0.900058	1.29603	1.4101	2.32418	1.13908	6.26837	6.64614	8.68586		1.78911	2.28925	195.353	1.27955	109.191
AT3G56000	CSLA14	cellulose synthase like A14; probable glucomannan synthase	4.54442	4.05229	4.51303	4.64584	3.32446	4.05582	5.67046	5.17852	5.95267		19.9194	16.2278	48.6934	0.814671	2.44453
AT3G58270	AT3G58270	phospholipase-like protein (PEARLI 4) with TRAF-like domain protein	4.48024	4.05229	3.6604	4.90723	3.80996	3.94756	6.29774	5.59283	5.61935		16.1848	18.8204	57.6967	1.16285	3.56488
AT3G59930	AT3G59930	defensin-like protein	2.33939	1.45011	1.96755	2.36286	2.00211	3.7031	4.9224	4.70162	5.59022		2.9014	6.39125	33.8403	2.20282	11.6634
AT3G60140	DIN2/SRG2/BGLU30	DARK INDUCIBLE 2; SENESCENCE-RELATED GENE 2; BETA GLUCOSIDASE 30; Glycosyl hydrolase superfamily protein	6.34345	5.19029	5.2796	5.25908	5.39506	5.21226	7.95579	7.46822	9.87438		51.1859	38.149	453.653	0.745302	8.86285
AT3G60890	ZPR2	LITTLE ZIPPER 2	2.01638	2.63153	2.42399	1.80171	2.32418	2.53844	4.53551	4.06645	4.36851		4.20302	3.76791	19.2006	0.896477	4.56829
AT3G61250	MYB17/LMI2	myb domain protein 17; transcription factor MYB17; LATE MERISTEM IDENTITY 2	4.10798	3.71435	3.81759	3.45224	2.80976	3.03816	5.25738	4.98101	5.4991		13.8231	7.7238	37.3527	0.558763	2.7022
AT3G62460	AT3G62460	Putative endonuclease or glycosyl hydrolase	5.19112	5.84044	5.04533	5.82089	5.28814	5.25831	6.74418	6.49129	6.36761		41.2844	43.6255	92.2466	1.05671	2.23442
AT4G00250	STKL2	DNA-binding storekeeper protein-related transcriptional regulator; Storekeeper-like 2; Transcription factor STKL2	2.01638	1.45011	1.29603	1.80171	0	1.13908	3.93224	3.70568	4.06394		2.07782	1.22958	14.0127	0.591762	6.74396
AT4G01026	PYL7/RCAR2/ABIP7	PYR1-like 7; REGULATORY COMPONENTS OF ABA RECEPTOR 2; ABI1-binding protein 7	7.59911	7.16906	7.12178	7.80697	7.94531	7.71574	8.66249	8.58047	9.12986		158.026	225.879	448.41	1.42937	2.83756
AT4G02540	AT4G02540	Cysteine/Histidine-rich C1 domain family protein	8.70122	8.17705	7.73813	8.57832	7.92761	7.44415	9.6264	8.71382	9.7936		305.385	265.618	698.251	0.86978	2.28646
AT4G03420	AT4G03420	Protein of unknown function (DUF789)	7.67274	7.26966	7.48037	7.8229	7.74426	7.58633	8.79453	8.17134	9.18449		177.975	210.008	437.054	1.17999	2.45571
AT4G04620	ATG8B	autophagy 8b; ubiquitin-like superfamily protein; autophagy-related protein 8b; autophagy-related ubiquitin-like modifier ATG8b	7.25047	6.33423	7.20952	6.90105	6.71703	7.17079	7.64905	7.9939	8.23717		125.987	121.934	251.461	0.967836	1.99594
AT4G04630	AT4G04630	senescence regulator (Protein of unknown function, DUF584)	5.57592	3.61587	4.98029	4.82526	4.09011	5.01178	6.12829	6.72409	6.92939		29.5086	24.8811	98.1857	0.84318	3.32736
AT4G05380	AT4G05380	P-loop nucleoside triphosphate hydrolase superfamily protein	0	0	0	0	0	0	4.8046	4.28794	2.78595		0	0	17.1259
AT4G07940	AT4G07940	pre-mRNA-splicing factor CWC22-like protein, putative (DUF3245)	1.01094	0	0	1.80171	1.58684	0	4.53551	4.06645	3.97657		0.338407	1.49674	17.5626	4.4229	51.8978
AT4G08150	KNAT1/BP	Homeobox protein knotted-1-like 1; BREVIPEDICELLUS	5.48073	5.67909	5.33267	5.22751	5.81011	5.16469	6.68984	6.89109	6.89407		44.3965	42.1477	112.623	0.949346	2.53676
AT4G11960	PGRL1B	PGR5-like protein 1B, chloroplastic; Ferredoxin-plastoquinone reductase 2	7.43106	7.02298	7.51522	7.07074	7.29741	7.68235	8.45006	8.33761	8.65805		160.856	164.715	358.058	1.02399	2.22596
AT4G13110	AT4G13110	BSD domain-containing protein	4.60585	4.2622	4.51303	4.13549	4.81006	4.95699	5.69274	5.31911	6.16516		21.1239	24.5627	53.4693	1.16279	2.53122
AT4G13494	MIR863A	MicroRNA863A, unknown function	4.34264	4.70698	4.20681	5.22751	5.46218	4.77888	6.25346	6.04155	6.51442		20.6245	35.3343	76.8604	1.71322	3.72666
AT4G13495	AT4G13495	non-coding RNA	9.17657	9.73101	9.016	9.96172	10.2256	9.47496	10.9362	10.3901	11.3997		647.729	967.712	2000.04	1.49401	3.08777
AT4G13820	AT4G13820	Leucine-rich repeat (LRR) family protein; disease resistance like protein	2.01638	2.15852	2.42399	1.80171	1.00141	1.76757	3.68798	3.89731	4.43557		3.62559	1.96436	15.476	0.541804	4.26855
AT4G14746	AT4G14746	neurogenic locus notch-like protein	5.80276	6.23818	6.26091	6.0547	6.28818	6.51065	7.62029	6.57781	7.39299		68.3323	77.6012	152.454	1.13564	2.23107
AT4G14930	AT4G14930	Survival protein SurE-like phosphatase/nucleotidase	8.25054	7.82143	8.48221	8.07869	8.07962	8.64023	9.2406	9.00675	9.79839		295.116	312.29	668.924	1.05819	2.26664
AT4G15236	ABCG43/PDR15	ATP-binding cassette G43; ABC-2 and Plant PDR ABC-type transporter family protein; ABC transporter G family member 43; Pleiotropic drug resistance protein 15	1.59953	2.15852	1.29603	2.93172	2.32418	3.03816	4.07476	3.70568	4.29818		2.31684	5.9508	15.5239	2.5685	6.70047
AT4G15920	SWEET17	Bidirectional sugar transporter SWEET17; Vacuolar hexose transporter; SUGARS WILL EVENTUALLY BE EXPORTED TRANSPORTERS 17; Nodulin MtN3 family protein	6.51341	6.84963	6.55694	6.17542	7.21224	6.23934	7.885	7.2832	7.96945		99.2794	97.7034	213.261	0.984125	2.14809
AT4G16240	AT4G16240	hypothetical protein	1.59953	0.900058	1.29603	0	1.58684	1.13908	4.14106	2.71376	3.43672		1.4507	1.06877	10.6773	0.736725	7.36012
AT4G17470	CRSH	alpha/beta-Hydrolases superfamily protein; Ca2+-activated RELA-SPOT Homolog, CRSH	2.01638	2.15852	1.96755	2.76584	3.00246	1.13908	4.7631	5.89198	6.40155		3.14042	4.67249	56.0255	1.48786	17.8401
AT4G18210	PUP10	purine permease 10	5.48073	5.49739	5.77753	5.51582	6.11129	5.98925	7.26643	6.35093	7.35885		47.2273	58.4704	132.244	1.23807	2.80017
AT4G19420	PAE8	Pectin acetylesterase 8; pectinacetylesterase family protein	9.74116	8.42986	8.87105	10.1618	8.71705	8.93066	11.1144	10.0552	11.6995		555.298	683.776	2201.26	1.23137	3.9641
AT4G21326	SBT3.12	subtilase 3.12; subtilisin-like protease SBT3.12	6.65093	5.88341	5.95726	6.43236	6.04716	5.90491	6.97074	7.30026	7.45895		72.8849	69.8028	151.995	0.957712	2.08542
AT4G21910	DTX39	MATE efflux family protein; multidrug and toxic compound extrusion (MATE) protein 39; protein DETOXIFICATION 39	7.05505	7.70049	7.65722	6.72008	7.87316	7.73215	8.46632	8.75463	9.36949		179.949	183.168	481.353	1.01788	2.67494
AT4G21930	AT4G21930	senescence regulator (Protein of unknown function, DUF584)	2.01638	0.900058	0	1.4101	1.00141	0	2.31114	3.22349	5.105		1.30393	0.8865	15.2396	0.679865	11.6874
AT4G22950	AGL19	AGAMOUS-like 19; agamous-like MADS-box protein AGL19	2.33939	1.84736	1.29603	2.93172	1.00141	3.23524	3.77408	4.53861	4.43557		2.70494	5.34966	18.5204	1.97773	6.84686
AT4G22960	AT4G22960	FAM63A-like protein (DUF544)	2.01638	1.84736	0	0.870878	0	1.76757	4.26518	3.70568	3.78415		1.88136	1.07786	14.3508	0.572915	7.6279
AT4G22990	PHT5;3	PHOSPHATE TRANSPORTER 5 family (PHT5;3); Major Facilitator Superfamily with SPX (SYG1/Pho81/XPR1) domain-containing protein	6.65093	6.42428	6.66435	6.69722	6.90968	6.45241	7.42786	7.69806	7.78246		94.9347	102.858	199.005	1.08346	2.09623
AT4G23670	AT4G23670	Polyketide cyclase/dehydrase and lipid transport superfamily protein	9.88905	10.3281	9.99416	9.35514	10.1963	9.51107	11.39	10.7334	11.5731		1083.52	851.613	2476.66	0.785972	2.28576
AT4G23680	AT4G23680	Polyketide cyclase/dehydrase and lipid transport superfamily protein	4.54442	4.96878	4.7655	5.02208	5.17266	3.40861	8.18916	5.6472	8.12483		26.283	25.3936	206.039	0.966161	7.83925
AT4G24450	PWD/GWD2	phosphoglucan, water dikinase; alpha-glucan water dikinase 2	6.59142	6.50904	6.60087	7.18197	6.68928	6.39173	8.30937	8.48295	8.33701		93.8578	109.79	331.792	1.16975	3.53505
AT4G24660	HB22/ZHD1/MEE68	homeobox protein 22; Zinc-finger homeodomain protein 2; MATERNAL EFFECT EMBRYO ARREST 68	5.77628	5.96569	6.28803	5.32021	6.2507	6.04286	6.70087	7.34206	7.00861		64.1484	59.6761	130.682	0.930283	2.03718
AT4G27260	WES1/GH3.5	Auxin-responsive GH3 family protein; Indole-3-acetic acid-amido synthetase GH3.5; Auxin-responsive GH3-like protein 5	8.20659	7.65162	7.79596	7.45156	7.67522	7.81151	9.00945	8.91832	10.1759		238.577	200.362	717.658	0.83982	3.00808
AT4G27300	SD1-1	S-locus lectin protein kinase family protein; G-type lectin S-receptor-like serine/threonine-protein kinase SD1-1	7.16119	7.79354	6.80244	7.29287	7.85455	7.0711	8.91074	8.43354	8.68241		157.872	173.242	411.619	1.09735	2.60729
AT4G27450	HUP54	aluminum induced protein with YGL and LRDR motifs; HYPOXIA RESPONSE UNKNOWN PROTEIN 54	10.1079	8.20272	9.42016	10.0077	9.07962	9.75944	11.3521	10.9257	11.8496		693.415	811.43	2748.92	1.17019	3.96433
AT4G27460	CBSX5	CBS domain-containing protein CBSX5; CBS domain-containing protein CBSX5Cystathionine beta-synthase (CBS) family protein;	3.47926	3.13673	4.20681	4.06581	3.32446	4.42229	5.34438	6.12054	5.7828		11.8046	15.0684	54.0864	1.27649	4.58182
AT4G28040	UMAMIT33	Usually multiple acids move in and out Transporters 33; nodulin MtN21 /EamA-like transporter family protein	7.7564	5.28947	6.53446	7.33791	5.9335	7.54976	9.2406	8.59091	10.3511		115.012	135.757	764.563	1.18038	6.64771
AT4G28270	RMA2	RING membrane-anchor 2; E3 ubiquitin-protein ligase RMA2; RING-type E3 ubiquitin transferase RMA2	6.82896	6.6772	7.90511	7.25423	7.11131	7.92293	8.49829	8.60815	8.84849		150.911	176.872	403.263	1.17203	2.67219
AT4G28390	AAC3/ANT3	ADP/ATP carrier 3, mitochondrial; Adenine nucleotide translocator 3	5.92832	5.46946	6.11706	5.48945	6.26956	6.14444	6.97074	6.81	7.45087		57.2048	63.2709	136.531	1.10604	2.38671
AT4G29140	ADS1/DTX51	ACTIVATED DISEASE SUSCEPTIBILITY 1; MATE efflux family protein; Multidrug and toxic compound extrusion (MATE) protein 51; Protein DETOXIFICATION 51; ALTERED DEVELOPMENT PROGRAM 1; NOVEL ION CARRIER 4	6.85449	6.6401	5.73873	6.61422	6.30656	5.84581	8.21632	7.10042	7.89991		88.6195	77.2105	223.494	0.871259	2.52195
AT4G29990	AT4G29990	Leucine-rich repeat transmembrane protein kinase protein	4.19052	4.3259	4.60219	4.13549	4.46211	4.50101	5.69274	5.53634	6.18479		19.8674	19.7532	55.9592	0.994255	2.81664
AT4G30250	AT4G30250	P-loop containing nucleoside triphosphate hydrolases superfamily protein; AAA-ATPase	4.92796	4.19557	3.48396	2.36286	3.58754	2.20389	6.47529	4.98101	6.60461		18.9843	6.25751	71.6235	0.329615	3.77278
AT4G30270	XTH24/MERI-5/SEN4	xyloglucan endotransglucosylase/hydrolase 24; meristem protein 5; SENESCENCE 4	11.4781	9.63212	10.5523	11.43	10.6258	10.862	12.8011	11.5296	13.0946		1714.97	2065.78	6279.16	1.20456	3.66138
AT4G31060	ERF015	Integrase-type DNA-binding superfamily protein; Ethylene-responsive transcription factor ERF015; DREB subfamily A-5 of ERF/AP2 transcription factor family	4.87903	5.15565	5.2245	5.16223	5.21219	5.68653	6.22317	6.31779	5.9296		33.1532	40.4599	70.8099	1.22039	2.13583
AT4G31330	AT4G31330	transmembrane protein, putative (protein of unknown function, DUF599)	3.34156	4.5558	3.6604	2.93172	4.00263	3.40861	5.73628	5.17852	5.85806		14.4336	10.4262	48.1756	0.722358	3.33774
AT4G31354	AT4G31354	hypothetical protein	3.47926	2.98716	3.04921	3.21533	3.17242	4.15653	5.19632	4.80089	5.02015		8.11964	11.0457	31.3298	1.36036	3.85853
AT4G31398	AT4G31398	Natural antisense transcript overlaps with AT4G31400	2.82606	2.15852	3.48396	3.33864	1.58684	2.53844	4.95962	4.41871	4.61986		6.5815	5.31001	24.6974	0.806808	3.75255
AT4G31405	AT4G31405	hypothetical protein	4.66478	3.3961	4.418	4.64584	3.80996	4.71427	6.92442	5.77477	6.35034		18.09	20.7701	84.9359	1.14815	4.69518
AT4G31408	AT4G31408	non-coding RNA	3.47926	2.98716	3.6604	2.10939	2.00211	3.03816	5.28697	4.28794	5.33316		9.57516	4.51179	31.9631	0.471197	3.33813
AT4G31615	REM35	Transcriptional factor B3 family protein; B3 domain-containing protein REM35; REPRODUCTIVE MERISTEM 35	2.33939	2.15852	1.96755	0.870878	1.00141	0	3.59642	3.35997	3.14772		3.47883	0.610242	9.40845	0.175416	2.70449
AT4G31650	REM6	Transcriptional factor B3 family protein; B3 domain-containing protein REM6; REPRODUCTIVE MERISTEM 6	4.82838	4.92831	4.84071	3.45224	5.25066	4.05582	6.04415	6.30093	6.06283		28.1715	20.8829	69.5606	0.741276	2.46918
AT4G31820	ENP/MAB4/NPY1	ENHANCER OF PINOID; MACCHI-BOU 4; NAKED PINS IN YUC MUTANTS 1; BTB/POZ domain-containing protein NPY1; Phototropic-responsive NPH3 family protein	6.87959	6.99386	7.29223	6.90105	6.71703	7.58633	8.64831	8.64535	8.6893		132.982	137.967	403.817	1.03748	3.03662
AT4G33550	AT4G33550	Bifunctional inhibitor/lipid-transfer protein/seed storage 2S albumin superfamily protein	4.66478	3.71435	4.68615	3.08048	3.58754	2.53844	6.50077	3.98436	6.46713		20.4117	7.76334	63.952	0.380338	3.13311
AT4G34970	ADF9	actin depolymerizing factor 9	5.57592	4.60797	4.91219	5.12845	4.75759	5.46879	6.55041	6.02111	6.99756		33.0654	34.439	94.4849	1.04154	2.85751
AT4G35190	LOG5	LONELY GUY 5; Cytokinin riboside 5'-monophosphate phosphoribohydrolase LOG5; Putative lysine decarboxylase family protein	3.01909	1.84736	3.04921	2.10939	2.5873	3.03816	4.84495	5.14113	6.29724		5.66085	5.17975	46.5567	0.915013	8.22433
AT4G38210	EXPA20	expansin A20	4.48024	4.3259	3.95932	4.64584	3.90951	4.05582	5.50407	5.67363	5.70339		18.31	17.8977	48.5106	0.977482	2.64941
AT5G01210	AT5G01210	HXXXD-type acyl-transferase family protein	8.05513	7.94321	8.50551	7.4986	7.95117	8.38917	8.83013	9.21681	9.59158		290.838	253.531	606.228	0.871724	2.08442
AT5G01305	ROX	transcription factor bHLH140-like protein; REGULATOR OF AXILLARY MERISTEM FORMATION	1.59953	0	0	0	0	0	3.02377	2.71376	3.78415		0.676814	0	8.48995	0	12.544
AT5G02020	SIS	Salt Induced Serine rich; E3 ubiquitin-protein ligase RLIM-like protein	7.59154	6.20469	6.97928	7.4986	6.92165	7.20646	8.0793	8.46415	9.08878		129.936	148.924	388.372	1.14613	2.98896
AT5G02030	PNY/RPL/BLH9/BLR/LSN/VAN	POX (plant homeobox) family protein; PENNYWISE; REPLUMLESS; BEL1-like homeodomain protein 9; BELLRINGER; LARSON; VAAMANA	5.92832	5.62947	6.28803	5.68805	6.1727	6.51065	7.09303	7.45304	7.39299		61.8481	70.6246	158.942	1.1419	2.56988
AT5G02490	Hsp70-2	Heat shock protein 70 (Hsp 70) family protein; Heat shock 70 kDa protein 2	5.15046	5.77349	5.43329	5.16223	5.21219	6.04286	7.05913	7.2038	6.40155		43.4761	45.2695	120.772	1.04125	2.7779
AT5G03190	CPUORF47	conserved peptide upstream open reading frame 47; peptide upstream protein	5.80276	6.11739	6.39171	5.94253	6.58774	6.41224	7.00675	7.15773	7.66162		68.7372	79.9513	156.955	1.16315	2.28341
AT5G04190	PKS4	phytochrome kinase substrate 4	4.60585	5.08378	4.20681	4.69283	4.95692	3.8305	6.20778	5.41624	6.43471		24.5765	22.7161	66.7072	0.924298	2.71426
AT5G05600	JOX2	Jasmonic oxidase 2; Jasmonate-induced oxygenase 2; 2-oxoglutarate (2OG) and Fe(II)-dependent oxygenase superfamily protein	7.20155	6.33423	6.02332	7.12314	7.58776	6.99155	8.75007	9.24792	9.49663		96.6398	152.01	585.982	1.57295	6.06357
AT5G06510	NF-YA10	nuclear transcription factor Y, subunit A10	1.01094	3.51016	1.96755	1.80171	2.32418	2.53844	4.67632	4.35481	5.33316		4.77331	3.76791	27.7809	0.78937	5.82004
AT5G06720	PA2/PER53/PRX53	peroxidase 2; Peroxidase 53	3.18931	3.80654	1.96755	2.76584	2.80976	1.13908	5.0313	3.80468	5.22359		8.0083	4.33851	27.0134	0.541751	3.37317
AT5G06865	AT5G06865	Natural antisense transcript overlaps with AT5G06860	5.23066	4.3259	4.84071	4.86683	4.95692	5.50744	6.20778	6.93546	6.54512		27.7526	34.2419	95.5663	1.23383	3.44351
AT5G06870	PGIP2	polygalacturonase inhibiting protein 2	8.01039	6.98402	6.4165	7.92974	7.67522	6.92172	8.93431	9.464	9.71143		155.62	188.822	676.933	1.21335	4.3499
AT5G07180	ERL2	ERECTA-like kinase 2; LRR receptor-like serine/threonine-protein kinase ERL2	5.92832	6.49526	6.44088	5.59216	6.57264	6.51065	7.68839	7.0808	7.60448		78.3287	77.2012	177.753	0.985606	2.26932
AT5G08600	AT5G08600	U3 ribonucleoprotein (Utp) family protein	4.87903	5.38227	4.91219	5.43521	5.64661	5.16469	6.71182	6.08159	6.27909		32.7484	42.0776	82.4023	1.28487	2.51623
AT5G10140	FLC/AGL25	MADS-box protein FLOWERING LOCUS C; K-box region and MADS-box transcription factor family protein; AGAMOUS-LIKE 25	5.80276	4.75404	6.147	4.44091	3.90951	5.06458	6.22317	7.13888	6.60461		50.2236	22.4038	103.319	0.446082	2.05718
AT5G10300	MES5/HNL	methyl esterase 5; alpha-hydroxynitrile lyase	4.41308	3.89319	3.81759	4.54701	3.70303	4.57565	4.88419	5.82281	5.90614		15.7541	19.082	47.7012	1.21124	3.02786
AT5G10625	FLP2	flowering-promoting factor 1-like protein 2	4.92796	4.3869	4.98029	5.02208	4.3246	5.30294	6.02672	5.69959	6.70315		26.6428	29.6691	72.7872	1.11359	2.73196
AT5G11610	AT5G11610	Exostosin family protein	5.44756	5.55168	5.65786	5.96184	6.15252	5.50744	6.62181	6.63273	6.45101		46.0108	58.6516	94.0677	1.27474	2.04447
AT5G12330	LRP1	LATERAL ROOT PRIMORDIUM 1; Lateral root primordium (LRP) protein-like protein	4.87903	4.96878	5.16721	4.73834	4.70314	5.25831	5.85956	6.00038	6.58996		31.2245	29.3384	71.8044	0.939596	2.29962
AT5G13220	JAZ10/TIFY9	jasmonate-zim-domain protein 10; TIFY domain/Divergent CCT motif family protein	4.82838	4.65832	4.98029	4.82526	4.64655	5.30294	6.19223	7.58424	6.43471		27.4096	29.9577	116.177	1.09297	4.23855
AT5G13330	Rap2.6L/ERF113	related to AP2 6L; Ethylene-responsive transcription factor ERF113	5.82876	5.77349	6.78351	5.9809	6.51057	6.89282	8.01446	7.22182	8.30599		72.9005	90.0563	240.446	1.23533	3.29827
AT5G14920	GASA14	Gibberellin-regulated family protein; Gibberellin-regulated protein 14; GAST1 protein homolog 14	9.62354	8.58434	9.71817	9.12824	8.9858	9.49433	10.3816	10.9903	10.1349		670.645	594.939	1496.55	0.887115	2.2315
AT5G16080	CXE17	carboxyesterase 17	3.72057	3.61587	4.7655	3.08048	3.70303	4.33903	5.73628	5.31911	5.83341		16.5473	12.9069	49.0836	0.780004	2.96627
AT5G16410	AT5G16410	HXXXD-type acyl-transferase family protein	4.10798	2.82028	3.2829	3.65568	2.5873	3.23524	5.28697	5.75015	5.99775		10.3465	8.34314	51.2551	0.80637	4.95384
AT5G18065	HTT3	target of trans acting-siR480/255 protein; Protein HEAT-INDUCED TAS1 TARGET 3	4.97529	4.44542	4.418	4.73834	4.17258	4.50101	5.9548	5.86929	6.10464		23.8737	21.4561	62.099	0.898733	2.60114
AT5G18840	AT5G18840	Major facilitator superfamily protein; Sugar transporter ERD6-like 16	6.30692	5.28947	5.2245	5.7337	5.09019	5.93358	8.09193	6.39925	6.97519		50.89	48.4658	160.022	0.952362	3.14447
AT5G19230	AT5G19230	Glycoprotein membrane precursor GPI-anchored	7.86719	7.72432	7.39561	7.90001	8.0028	8.12906	8.61953	8.56643	9.03032		203.447	257.438	430.762	1.26538	2.11731
AT5G20240	PI	Floral homeotic protein PISTILLATA; K-box region and MADS-box transcription factor family protein	1.59953	0	2.77021	2.36286	2.5873	4.05582	6.71182	4.64931	5.8823		2.6175	8.26162	61.9682	3.1563	23.6745
AT5G20420	CHR42/CLSY2	chromatin remodeling 42; SNF2 domain-containing protein CLASSY 2	3.01909	2.82028	1.96755	1.4101	2.00211	2.80983	4.00526	4.64931	4.43557		5.36019	3.55847	19.9307	0.66387	3.71829
AT5G21020	AT5G21020	transmembrane protein	9.35938	8.94788	9.90935	9.21127	9.19263	9.79892	10.2108	10.5178	10.9299		703.103	688.553	1533.04	0.979307	2.18039
AT5G21105	AT5G21105	Plant L-ascorbate oxidase	8.55312	8.42986	8.18313	8.2495	8.31568	8.25365	9.7537	9.00675	9.38866		336.041	308.386	681.663	0.917704	2.02851
AT5G23010	MAM1/IMS3	methylthioalkylmalate synthase 1, chloroplastic; 2-isopropylmalate synthase 3	10.073	10.3815	9.67001	10.0182	10.2171	9.16929	11.1606	11.3771	10.9087		1074.25	933.344	2289.41	0.868831	2.13117
AT5G23810	AAP7	amino acid permease 7	4.02044	4.60797	4.418	4.32638	4.81006	3.94756	5.64783	5.72509	5.95267		19.6638	20.1811	53.9896	1.02631	2.74563
AT5G24010	AT5G24010	Protein kinase superfamily protein; probable receptor-like protein kinase	6.59142	5.75046	6.02332	6.19187	5.95696	5.68653	7.47361	6.59174	7.58983		70.7694	61.2411	154.613	0.865361	2.18474
AT5G24030	SLAH3	SLAC1 homologue 3; S-type anion channel SLAH3	8.92563	7.74194	7.75767	8.55308	8.22197	7.46394	10.7402	7.99914	10.3402		304.588	282.579	1086.57	0.927742	3.56736
AT5G24160	SQE6	squalene monooxygenase 6; Squalene epoxidase 6	6.37908	6.93381	7.79596	6.0547	7.90969	8.39434	10.0464	9.14777	10.3812		141.577	213.47	985.129	1.5078	6.95826
AT5G24280	GMI1	gamma-irradiation and mitomycin c induced 1; structural maintenance of chromosomes flexible hinge domain-containing protein GMI1	5.60631	6.50904	5.85213	5.77796	5.88541	6.14444	8.19307	7.64561	7.32388		64.8531	60.5743	216.706	0.934023	3.34149
AT5G24770	VSP2	vegetative storage protein 2	6.19142	5.22411	1.29603	4.38478	5.4946	3.03816	8.69871	8.16669	9.08878		36.638	23.7303	414.785	0.647695	11.3212
AT5G24780	VSP1	vegetative storage protein 1	3.34156	3.80654	4.20681	3.65568	4.3246	2.80983	5.81963	5.6472	5.83341		13.1984	12.2173	53.5383	0.925663	4.05641
AT5G25140	CYP71B13	cytochrome P450, family 71, subfamily B, polypeptide 13	4.87903	5.19029	3.81759	3.91544	4.95692	3.40861	7.48642	3.80468	7.56009		25.6792	17.9223	126.338	0.69793	4.91987
AT5G25230	GFL	109 kDa U5 small nuclear ribonucleoprotein component; Ribosomal protein S5/Elongation factor G/III/V family protein	2.82606	2.41433	2.77021	2.57837	2.32418	1.76757	4.9224	4.47991	4.29818		5.4147	3.79508	23.1041	0.700886	4.26692
AT5G25280	AT5G25280	serine-rich protein-like protein	10.2276	9.19601	9.9224	10.2905	9.38651	9.7714	10.8857	10.67	11.4039		917.615	930.898	2075.97	1.01448	2.26235
AT5G27360	SFP2	Major facilitator superfamily protein; sugar-porter family protein 2; sugar transporter ERD6-like 18	5.10862	5.96569	4.31627	5.51582	5.73068	4.84073	7.66604	6.08159	8.23246		37.9733	41.5035	189.527	1.09296	4.99107
AT5G27950	KIN-14U	Kinesin-like protein KIN-14U; P-loop containing nucleoside triphosphate hydrolases superfamily protein	8.48116	8.46211	8.55659	8.52738	8.66458	8.65321	9.61478	9.46966	10.112		361.173	391.455	865.572	1.08384	2.39656
AT5G36220	CYP81D1	cytochrome P450, family 81, subfamily D, polypeptide 1	4.7214	5.04646	5.57218	4.13549	5.46218	5.75237	6.34069	6.72409	7.37602		34.6681	37.5217	116.626	1.08231	3.36409
AT5G38565	AT5G38565	F-box/FBD-like domains containing protein	1.59953	2.63153	1.29603	2.36286	2.00211	2.53844	4.6309	4.06645	3.67737		2.89427	3.98644	17.1081	1.37736	5.91104
AT5G38780	AT5G38780	S-adenosyl-L-methionine-dependent methyltransferases superfamily protein	3.34156	4.2622	3.95932	3.21533	4.39499	3.8305	5.52905	5.38459	6.14527		13.9604	13.8511	51.9102	0.99217	3.7184
AT5G39520	CSAP	CHLOROPLAST-LOCALIZED SENESCENCE-ASSOCIATED PROTEIN (DUF1997)	3.18931	2.63153	3.2829	3.08048	2.00211	3.03816	4.14106	6.31779	8.29249		7.35057	5.89308	135.983	0.801717	18.4997
AT5G39850	AT5G39850	40S ribosomal protein S4	5.15046	6.00514	5.2796	4.64584	5.67518	5.01178	7.33884	6.5352	7.315		45.1964	35.1315	136.955	0.777307	3.03022
AT5G42680	AT5G42680	MIZU-KUSSEI-like protein (Protein of unknown function, DUF617)	4.82838	5.41193	4.68615	4.9848	5.09019	5.61754	5.93625	6.47635	6.54512		31.2432	37.275	80.2188	1.19306	2.56756
AT5G44572	AT5G44572	transmembrane protein	7.26006	6.93381	7.45666	6.22421	7.61751	8.38917	10.1109	9.47155	10.3402		149.402	201.136	1036.37	1.34628	6.93679
AT5G45570	AT5G45570	Ulp1 protease family protein	1.59953	1.45011	0	1.4101	1.00141	0	5.79924	6.35093	5.64791		1.25424	0.8865	61.4836	0.706802	49.0206
AT5G45990	AT5G45990	crooked neck protein, putative / cell cycle protein	2.01638	2.15852	2.42399	2.57837	2.80976	1.13908	5.13256	4.53861	4.83384		3.62559	4.06225	27.9465	1.12044	7.70813
AT5G47590	AT5G47590	Heat shock protein HSP20/alpha crystallin family	4.34264	3.27223	3.95932	3.74756	3.17242	4.71427	5.5536	5.6472	5.40185		14.1686	15.2326	45.454	1.07509	3.20808
AT5G48850	ATSDI1	SULFUR DEFICIENCY-INDUCED 1; tetratricopeptide repeat (TPR)-like superfamily protein	3.60495	4.70698	2.77021	3.08048	2.80976	2.53844	5.16479	6.72409	4.06394		14.0359	6.09343	51.772	0.434133	3.68855
AT5G49520	WRKY48	WRKY DNA-binding protein 48; WRKY transcription factor 48	5.37882	5.22411	4.08837	5.19524	5.64661	4.05582	6.90547	5.97934	6.95247		30.9991	33.4547	101.275	1.07921	3.26702
AT5G49690	UGT91C1	UDP-glycosyltransferase 91C1; UDP-Glycosyltransferase superfamily protein	3.92724	3.13673	3.48396	2.93172	3.00246	3.40861	4.88419	4.64931	5.85806		10.7323	7.75436	36.5432	0.722523	3.40497
AT5G49700	AHL17	AT-hook motif nuclear-localized protein 17; Putative AT-hook DNA-binding family protein	5.66522	5.08378	6.05524	4.49494	5.64661	5.46879	7.68839	6.446	7.9919		49.3858	37.9767	181.674	0.76898	3.67866
AT5G50940	AT5G50940	RNA-binding KH domain-containing protein	4.54442	2.98716	3.95932	4.32638	3.46199	3.94756	5.45278	5.06329	5.90614		14.6064	14.5034	44.7339	0.992948	3.06262
AT5G51390	AT5G51390	hypothetical protein	4.92796	4.50166	5.16721	5.40731	5.13201	5.58176	6.25346	6.50607	6.63346		28.6758	40.7996	87.8217	1.42279	3.06257
AT5G52640	HSP90.1	Heat shock protein 90-1	4.77588	4.75404	5.48109	5.71106	4.86069	5.38825	7.25898	6.13963	7.80165		32.0152	40.1068	147.93	1.25274	4.62062
AT5G53230	DOB6	protein of unknown function (DUF295); DUF295 ORGANELLAR B 6	0	0	0	0	0	0	5.25738	4.28794	2.78595		0	0	20.5603
AT5G53830	VQ33/MVQ3	VQ motif-containing protein 33; MPK3/6-targeted VQ-motif-containing protein 3	4.87903	5.55168	4.51303	4.54701	5.04712	4.15653	5.64783	6.23146	6.24211		32.0548	23.7576	65.9898	0.741157	2.05865
AT5G56370	AT5G56370	F-box/RNI-like/FBD-like domains-containing protein	3.72057	3.61587	2.42399	4.32638	3.80996	4.15653	5.19632	5.84623	6.26072		9.26968	16.3069	55.9571	1.75917	6.03657
AT5G56810	AT5G56810	F-box/RNI-like/FBD-like domains-containing protein; F-box/FBD/LRR-repeat protein	2.33939	1.84736	2.77021	1.4101	1.58684	1.76757	4.84495	4.21782	4.56101		4.16046	2.02208	22.6505	0.486025	5.44424
AT5G57240	ORP4C	OSBP(oxysterol binding protein)-related protein 4C	4.60585	4.84381	4.60219	4.06581	5.36029	4.95699	6.87657	6.64614	6.70315		24.785	28.6283	106.286	1.15507	4.28834
AT5G57340	AT5G57340	ras guanine nucleotide exchange factor Q-like protein	6.25032	6.37996	6.6849	5.54172	6.7307	6.39173	7.81565	7.37465	8.8268		86.432	77.9177	280.775	0.901492	3.24851
AT5G57550	XTH25	xyloglucan endotransglucosylase/hydrolase 25	5.10862	2.41433	4.60219	4.32638	3.17242	4.25066	6.16061	5.79899	7.15508		20.3738	15.0378	88.9128	0.738098	4.36409
AT5G58350	WNK4	with no lysine (K) kinase 4; serine/threonine-protein kinase	8.0047	8.06952	8.48221	8.38443	8.81016	8.57804	9.15294	9.05279	9.86984		293.358	387.4	677.666	1.32057	2.31003
AT5G59220	HAI1/SAG113	HIGHLY ABA-INDUCED PP2C GENE 1; PP2C protein (Clade A protein phosphatases type 2C); SENESCENCE ASSOCIATED GENE 113	3.01909	3.13673	3.81759	2.36286	2.00211	2.53844	4.07476	4.28794	6.83319		9.33382	3.98644	49.1364	0.427097	5.26434
AT5G59780	MYB59	myb domain protein 59; transcription factor MYB59	7.16119	7.26154	7.42034	7.07074	7.71016	7.78029	8.67093	7.92406	9.38654		154.956	186.892	438.922	1.2061	2.83256
AT5G60250	AT5G60250	zinc finger (C3HC4-type RING finger) family protein	2.60315	3.27223	1.96755	2.36286	2.80976	2.20389	6.26837	5.53634	5.8823		5.54952	4.58759	59.8266	0.826665	10.7805
AT5G60270	LECRK-I.7	L-type lectin-domain containing receptor kinase I.7; Concanavalin A-like lectin protein kinase family protein	6.96413	6.287	7.06018	7.23848	7.00279	7.17079	8.08353	8.00955	8.10951		111.132	140.114	267.383	1.26079	2.40599
AT5G60970	TCP5	TEOSINTE BRANCHED 1, cycloidea and PCF transcription factor 5	5.4136	5.352	5.85213	5.79958	5.78412	6.0163	6.84708	6.35093	7.32388		46.0772	57.5106	117.989	1.24813	2.56068
AT5G61640	PMSR1	peptidemethionine sulfoxide reductase 1	6.26944	5.88341	6.62234	6.19187	6.52634	6.99155	7.50542	7.11978	7.73666		77.2309	96.511	177.023	1.24964	2.29213
AT5G61740	ABCA10	ATP-binding cassette A10; ABC2 homolog 14; ABC transporter A family member 10	3.18931	2.82028	1.96755	2.76584	3.32446	1.13908	5.28697	5.44721	4.97578		5.6986	5.34046	37.0462	0.937153	6.50093
AT5G63090	LOB/ASL4	LATERAL ORGAN BOUNDARIES; ASYMMETRIC LEAVES 2-like protein 4; Lateral organ boundaries (LOB) domain family protein	3.8276	3.80654	2.42399	2.57837	4.00263	3.40861	6.42295	5.50724	6.16516		10.1855	9.8737	66.6826	0.969387	6.54681
AT5G63450	CYP94B1	cytochrome P450, family 94, subfamily B, polypeptide 1; Jasmonoyl-L-amino acid 12-hydroxylase	4.02044	3.3961	3.6604	3.33864	4.75759	4.84073	5.47865	5.95799	5.85806		12.1333	20.9408	53.9189	1.72589	4.44387
AT5G63760	ARI15	ARIADNE 15; ariadne homolog 15; RING/U-box superfamily protein; Probable E3 ubiquitin-protein ligase	6.39657	6.02446	6.4165	5.94253	6.26956	6.51065	7.36682	7.21284	7.47498		77.2542	75.6096	162.771	0.978713	2.10695
AT5G64060	NAC103	NAC domain containing protein 103	2.01638	3.80654	3.2829	2.76584	2.80976	2.80983	6.12829	4.84807	4.14632		8.25696	5.94171	37.8203	0.7196	4.58042
AT5G64190	AT5G64190	neuronal PAS domain protein	3.60495	4.12571	4.08837	3.45224	4.52625	4.90003	6.0784	5.72509	6.75658		14.5449	20.2819	75.199	1.39443	5.17012
AT5G64910	AT5G64910	Serine/Threonine-kinase	2.33939	3.27223	2.42399	1.4101	2.32418	1.76757	5.91746	5.47754	6.70315		5.69628	2.69005	68.7308	0.472247	12.0659
AT5G65280	GCL1	GCR2-like 1; G protein-coupled receptor 2-like protein 1	5.34318	4.88668	4.418	4.82526	5.00272	4.33903	5.62484	6.12054	6.49883		29.5178	25.8828	68.7862	0.876854	2.33033
AT5G65510	AIL7/PLT7	AINTEGUMENTA-like 7; PLETHORA 7; AP2-like ethylene-responsive transcription factor	3.60495	3.51016	1.29603	2.57837	2.5873	2.80983	5.28697	4.35481	4.88273		7.67221	5.33147	28.6683	0.694906	3.73664
AT5G66350	SHI	SHORT INTERNODES; lateral root primordium (LRP) protein-like protein	3.47926	3.51016	2.77021	3.33864	4.09011	3.03816	4.67632	5.10273	5.36791		8.78932	10.7874	32.7421	1.22733	3.72521
AT5G66480	AT5G66480	bacteriophage N4 adsorption B protein	4.19052	4.84381	5.10756	5.05841	4.58766	5.58176	5.87912	6.24914	6.20415		26.1507	34.0869	68.5495	1.30348	2.62132
AT5G67300	MYBR1/MYB44	myb domain protein r1; myb domain protein 44	10.5414	9.73981	9.58233	10.3604	10.1538	9.36877	11.2822	10.7828	11.6184		1036.32	1037.31	2464.4	1.00096	2.37804
