# Supplementary material for: Growth Developmental Defects of Mitochondrial Iron Transporter 1 and 2 Mutants in Arabidopsis in Iron Sufficient Conditions
Source: Preprints.org preprint supplement (doi:10.20944/preprints202301.0097.v1), 2023-01-05
Supplement: Supplementary file 2 [file Supplementary Table S1.docx]

Supplementary Table S1. List of primers used in this work

| Primer | used for | Orientation | Primer (5’-3’) |
| --- | --- | --- | --- |
| 1 | Amplification of *ADH1* promoter | Forward | AGCGGATAACAATTTCACACAGGAAACAGCTAGGCGCATGCAACTTCTTTTC |
| 2 | Amplification of *ADH1* promoter to be fused to *MIT2* cds | Reverse | TTTGGGTACGGTTGTAGCCTCCGTAGCCATCATATGTATATGAGATAGTTGATTGTATGCTTGGTATAG |
| 3 | Amplification of *ADH1* promoter to be fused to *MIT1* cds | Reverse | TGGGAATTTGGTTGTTGCTTCTGTTGCCATCATATGTATATGAGATAGTTGATTGTATGCTTGGTATAG |
| 4 | Amplification of *MIT2* cds | Forward | ATGGCTACGGAGGCTACAAC |
| 5 | Amplification of *MIT2* cds | Reverse | TCAGGCAGTGTTTGAATCGAC |
| 6 | Amplification of *MIT1* cds | Forward | ATGGCAACAGAAGCAACAACCA |
| 7 | Amplification of *MIT1* cds | Reverse | TCAAGCTGCGTTTGCTTCACCAT |
| 8 | Amplification of *ADH2* terminator to be fused to *MIT2* cds | Forward | GACTTCAATGTCGATTCAAACACTGCCTGATTTGTAATACGACTCACTATAG |
| 9 | Amplification of *ADH2* terminator | Reverse | GGTAACGCCAGGGTTTTCCCAGTCACGACGGCCGGTAGAGGTGTGGTCAATAAG |
| 10 | Amplification of *ADH2* terminator to be fused to *MIT1* cds | Forward | GATCTCAATGGTGAAGCAAACGCAGCTTGATTTGTAATACGACTCACTATAG |
| 11 | Genotyping of *mit2* mutants and *MIT2* expression by RT-PCR | Forward | TTGCAGATGGGTGAAGGGAC |
| 12 | Genotyping of *mit2* mutants and *MIT2* expression by RT-PCR | Reverse | GCAGGATCCTCAAGAGTGTGA |
| LBb1.3 | Genotyping of SALK mutants | - | ATTTTGCCGATTTCGGAAC |
| LB1sail | Genotyping of *mit2-2* mutant | - | GCCTTTTCAGAAATGGATAAATAGCCTTGCTTCC |
| RB | Characterization of T-DNA insertion in *mit2-1* | - | TGGAACGTCAGTGGAGCATT |
| 13 | Genotyping of *mit1* mutants and *MIT1* expression by RT-PCR | Forward | GTCATTTCTCCAATCTTCTCGG |
| 14 | Genotyping of *mit1* mutants and *MIT1* expression by RT-PCR | Reverse | CTGTTTCATAAGTGGACCAGC |
| 15 | Genotyping of *mit1* mutants and *MIT1* expression by RT-PCR | Forward | TCTCCAATCTTCTCGGAACCC |
| 16 | Genotyping of *mit1* mutants and *MIT1* expression by RT-PCR | Reverse | AGCATGCTCAGGCAACATCT |
| 17 | *MIT2* expression by RT-PCR | Forward | AGATAATGTAGTCCACCACCACAC |
| 18 | *MIT2* expression by RT-PCR | Reverse | AAGAAAAGCAGGATCCTCAAGAGT |
| 19 | *MIT2* expression by RT-qPCR | Forward | TGCAATGTCAGGGTGTGTGT |
| 20 | *MIT2* expression by RT-qPCR | Forward | ATGTCAGGGTGTGTGTGGAT |
| 21 | *MIT2* expression by RT-qPCR | Reverse | CGGGAGCCATCCCCTTAGAA |
| At4g24550F | Clathrin adaptor expression by RT-qPCR | Forward | AATACGCGCTGAGTTCCCTT |
| At4g24550R | Clathrin adaptor expression by RT-qPCR | Reverse | AGCACCGGGTTCTAACTCAA |
| At4g34270F | TIP41-like expression by RT-qPCR | Forward | GCCAAGCTCATGGTTCCTCC |
| At4g34270R | TIP41-like expression by RT-qPCR | Reverse | TGCCTCATCTTCGCCAAACC |
| At2g21640F | UPOX expression by RT-qPCR | Forward | AATCGAAACCGAGAACCCGC |
| At2g21640R | UPOX expression by RT-qPCR | Reverse | GGTTTGCAAAGAAAGTGGCGT |
| At5g09570F | MSM1 expression by RT-qPCR | Forward | CTCAGCCTAGTAGCGGTGGT |
| At5g09570R | MSM1 expression by RT-qPCR | Reverse | GCAGTTCCAGTACCCCAAGC |
| At3g22370F | *AOX1A* expression by RT-qPCR | Forward | GGAATCGCGAGCTATTGGGG |
| At3g22370R | *AOX1A* expression by RT-qPCR | Reverse | ACGTTTCCCATGGCCTGAAA |
| At4g19690F | *IRT1* expression by RT-qPCR | Forward | CAAATGCACAGCTCTTGCGA |
| At4g19690R | *IRT1* expression by RT-qPCR | Reverse | AATCCAATGACCACCGAGTGAA |
| At1g01580F | *FRO2* expression by RT-qPCR | Forward | GGTTATGGTGTGCGGAGGAA |
| At1g01580R | *FRO2* expression by RT-qPCR | Reverse | TTTCCTTTTGGCTTGTGGCG |

Start and stop codons are underlined
