# Supplementary material for: Growth Developmental Defects of Mitochondrial Iron Transporter 1 and 2 Mutants in Arabidopsis in Iron Sufficient Conditions
Source: Preprints.org preprint supplement (doi:10.20944/preprints202301.0097.v1), 2023-01-05
Supplement: Supplementary file 5 [file Supplementary Table S6.xlsx]

## Sheet: C1 JERARQUIZADO
	Arabidopsis thaliana (REF)	upload_1 ( Hierarchy NEW! Tips)
GO biological process complete	# total genes	# genes in cluster 1	expected	Fold Enrichment	raw P value	FDR
cell-cell junction assembly (GO:0007043)	6	4	.09	45.72	8.24E-06	8.52E-04
cell junction assembly (GO:0034329)	7	4	.10	39.19	1.28E-05	1.28E-03
cell junction organization (GO:0034330)	11	4	.16	24.94	5.06E-05	4.32E-03
cell-cell junction organization (GO:0045216)	10	4	.15	27.43	3.75E-05	3.35E-03
coumarin biosynthetic process (GO:0009805)	6	3	.09	34.29	2.32E-04	1.65E-02
coumarin metabolic process (GO:0009804)	9	5	.13	38.10	1.08E-06	1.38E-04
phenylpropanoid metabolic process (GO:0009698)	118	18	1.72	10.46	1.22E-12	4.22E-10
secondary metabolic process (GO:0019748)	839	52	12.23	4.25	9.34E-18	6.88E-15
phenylpropanoid biosynthetic process (GO:0009699)	94	14	1.37	10.21	5.26E-10	1.03E-07
secondary metabolite biosynthetic process (GO:0044550)	183	17	2.67	6.37	5.67E-09	9.84E-07
organic cyclic compound biosynthetic process (GO:1901362)	947	29	13.81	2.10	2.75E-04	1.91E-02
suberin biosynthetic process (GO:0010345)	22	8	.32	24.94	7.54E-09	1.27E-06
zinc ion transmembrane transport (GO:0071577)	23	5	.34	14.91	4.48E-05	3.94E-03
zinc ion transport (GO:0006829)	27	5	.39	12.70	8.75E-05	7.06E-03
transition metal ion transport (GO:0000041)	74	9	1.08	8.34	3.08E-06	3.63E-04
metal ion transport (GO:0030001)	202	11	2.95	3.73	2.80E-04	1.92E-02
inorganic cation transmembrane transport (GO:0098662)	190	11	2.77	3.97	1.69E-04	1.23E-02
cation transmembrane transport (GO:0098655)	198	11	2.89	3.81	2.38E-04	1.67E-02
iron ion transport (GO:0006826)	28	6	.41	14.69	8.12E-06	8.55E-04
aminoglycan metabolic process (GO:0006022)	23	4	.34	11.93	5.68E-04	3.49E-02
response to zinc ion (GO:0010043)	43	5	.63	7.97	6.16E-04	3.71E-02
response to stimulus (GO:0050896)	9347	169	136.30	1.24	8.04E-04	4.38E-02
root hair elongation (GO:0048767)	77	8	1.12	7.12	3.11E-05	2.82E-03
root hair cell development (GO:0080147)	109	12	1.59	7.55	1.89E-07	2.78E-05
cell development (GO:0048468)	419	21	6.11	3.44	1.95E-06	2.39E-04
cell differentiation (GO:0030154)	1241	53	18.10	2.93	7.27E-12	2.04E-09
cellular developmental process (GO:0048869)	1394	53	20.33	2.61	4.28E-10	8.70E-08
developmental process (GO:0032502)	5855	149	85.38	1.75	6.04E-13	2.37E-10
anatomical structure development (GO:0048856)	5351	145	78.03	1.86	1.08E-14	5.80E-12
root hair cell differentiation (GO:0048765)	143	17	2.09	8.15	1.80E-10	4.24E-08
trichoblast maturation (GO:0048764)	143	17	2.09	8.15	1.80E-10	4.07E-08
trichoblast differentiation (GO:0010054)	151	20	2.20	9.08	7.19E-13	2.65E-10
root epidermal cell differentiation (GO:0010053)	172	22	2.51	8.77	9.54E-14	4.32E-11
plant epidermal cell differentiation (GO:0090627)	212	22	3.09	7.12	4.34E-12	1.28E-09
root morphogenesis (GO:0010015)	680	58	9.92	5.85	4.14E-26	6.10E-23
root development (GO:0048364)	1196	91	17.44	5.22	1.33E-37	7.84E-34
root system development (GO:0022622)	1201	91	17.51	5.20	1.81E-37	5.34E-34
system development (GO:0048731)	3708	113	54.07	2.09	2.11E-14	1.04E-11
multicellular organism development (GO:0007275)	4391	127	64.03	1.98	1.04E-14	6.12E-12
multicellular organismal process (GO:0032501)	4733	127	69.02	1.84	2.46E-12	7.63E-10
plant organ development (GO:0099402)	1982	102	28.90	3.53	8.42E-29	1.65E-25
plant organ morphogenesis (GO:1905392)	909	63	13.26	4.75	8.58E-24	1.01E-20
anatomical structure morphogenesis (GO:0009653)	1601	70	23.35	3.00	5.64E-16	3.69E-13
plant epidermis development (GO:0090558)	640	52	9.33	5.57	1.45E-22	1.42E-19
tissue development (GO:0009888)	1836	84	26.77	3.14	2.33E-20	1.96E-17
cell maturation (GO:0048469)	144	17	2.10	8.10	1.98E-10	4.17E-08
anatomical structure maturation (GO:0071695)	333	23	4.86	4.74	2.56E-09	4.58E-07
developmental maturation (GO:0021700)	356	24	5.19	4.62	1.80E-09	3.32E-07
developmental growth involved in morphogenesis (GO:0060560)	457	21	6.66	3.15	7.02E-06	7.66E-04
developmental growth (GO:0048589)	1101	52	16.06	3.24	3.13E-13	1.32E-10
growth (GO:0040007)	1318	52	19.22	2.71	1.83E-10	4.00E-08
cell growth (GO:0016049)	543	21	7.92	2.65	7.88E-05	6.54E-03
plant-type cell wall modification (GO:0009827)	65	6	.95	6.33	5.53E-04	3.43E-02
cell wall modification (GO:0042545)	174	14	2.54	5.52	6.41E-07	8.59E-05
cell wall organization (GO:0071555)	304	24	4.43	5.41	9.24E-11	2.37E-08
cell wall organization or biogenesis (GO:0071554)	971	47	14.16	3.32	2.13E-12	6.98E-10
external encapsulating structure organization (GO:0045229)	359	27	5.24	5.16	1.70E-11	4.55E-09
plant-type cell wall organization (GO:0009664)	169	15	2.46	6.09	7.83E-08	1.25E-05
plant-type cell wall organization or biogenesis (GO:0071669)	516	20	7.52	2.66	1.13E-04	8.87E-03
hexose metabolic process (GO:0019318)	88	7	1.28	5.45	4.49E-04	2.91E-02
monosaccharide metabolic process (GO:0005996)	126	8	1.84	4.35	7.34E-04	4.08E-02
carbohydrate metabolic process (GO:0005975)	1062	40	15.49	2.58	9.04E-08	1.40E-05
toxin metabolic process (GO:0009404)	119	9	1.74	5.19	1.01E-04	8.07E-03
cell wall macromolecule metabolic process (GO:0044036)	215	12	3.14	3.83	1.20E-04	9.32E-03
response to oxidative stress (GO:0006979)	613	32	8.94	3.58	1.52E-09	2.88E-07
inorganic ion homeostasis (GO:0098771)	352	18	5.13	3.51	8.12E-06	8.70E-04
ion homeostasis (GO:0050801)	381	18	5.56	3.24	2.23E-05	2.12E-03
chemical homeostasis (GO:0048878)	552	26	8.05	3.23	3.64E-07	5.10E-05
homeostatic process (GO:0042592)	614	26	8.95	2.90	2.41E-06	2.90E-04
regulation of biological quality (GO:0065008)	1172	33	17.09	1.93	4.38E-04	2.90E-02
unidimensional cell growth (GO:0009826)	361	16	5.26	3.04	1.28E-04	9.83E-03
cell morphogenesis (GO:0000902)	489	19	7.13	2.66	1.62E-04	1.19E-02
polysaccharide metabolic process (GO:0005976)	492	19	7.17	2.65	1.74E-04	1.25E-02
Overrepresentation of GO terms (biological processes) was evaluated using the PANTHER Overrepresentation Test tool.
Significance was analyzed using Fisher´s exact test, and FDR (False discovery Rate) < 0.05
