# Supplementary material for: Growth Developmental Defects of Mitochondrial Iron Transporter 1 and 2 Mutants in Arabidopsis in Iron Sufficient Conditions
Source: Preprints.org preprint supplement (doi:10.20944/preprints202301.0097.v1), 2023-01-05
Supplement: Supplementary file 6 [file Supplementary Table S7.xlsx]

## Sheet: C2 JERARQUIZADO
	Arabidopsis thaliana (REF)	upload_1 ( Hierarchy NEW! Tips)
GO biological process complete	# total genes	# genes in cluster 2	expected	Fold Enrichment	raw P value	FDR
negative regulation of defense response to insect (GO:1900366)	5	3	.06	48.69	9.57E-05	1.48E-02
regulation of biological process (GO:0050789)	7586	129	93.48	1.38	3.07E-05	5.17E-03
biological regulation (GO:0065007)	8286	140	102.10	1.37	1.66E-05	3.48E-03
production of siRNA involved in gene silencing by small RNA (GO:0070919)	10	3	.12	24.35	4.67E-04	4.37E-02
regulation of metabolic process (GO:0019222)	3941	73	48.56	1.50	4.27E-04	4.06E-02
regulation of macromolecule metabolic process (GO:0060255)	3253	63	40.08	1.57	3.57E-04	3.63E-02
regulation of gene expression (GO:0010468)	2792	56	34.40	1.63	2.90E-04	3.22E-02
heterochromatin assembly (GO:0031507)	62	6	.76	7.85	1.81E-04	2.31E-02
chromatin assembly (GO:0031497)	107	7	1.32	5.31	5.03E-04	4.56E-02
heterochromatin organization (GO:0070828)	65	6	.80	7.49	2.29E-04	2.76E-02
negative regulation of gene expression, epigenetic (GO:0045814)	73	6	.90	6.67	4.10E-04	4.03E-02
regulation of jasmonic acid mediated signaling pathway (GO:2000022)	44	11	.54	20.29	5.49E-11	3.59E-08
regulation of signal transduction (GO:0009966)	422	16	5.20	3.08	1.06E-04	1.61E-02
regulation of cell communication (GO:0010646)	444	16	5.47	2.92	1.86E-04	2.33E-02
regulation of cellular process (GO:0050794)	6238	106	76.87	1.38	3.19E-04	3.48E-02
regulation of signaling (GO:0023051)	432	16	5.32	3.01	1.38E-04	2.03E-02
jasmonic acid metabolic process (GO:0009694)	49	8	.60	13.25	4.36E-07	1.35E-04
monocarboxylic acid metabolic process (GO:0032787)	666	20	8.21	2.44	5.21E-04	4.65E-02
carboxylic acid metabolic process (GO:0019752)	1571	42	19.36	2.17	3.33E-06	8.92E-04
oxoacid metabolic process (GO:0043436)	2009	55	24.76	2.22	4.71E-08	1.63E-05
organic acid metabolic process (GO:0006082)	2149	59	26.48	2.23	1.11E-08	4.67E-06
small molecule metabolic process (GO:0044281)	2900	62	35.73	1.74	2.53E-05	4.51E-03
xenobiotic detoxification by transmembrane export across the plasma membrane (GO:1990961)	50	5	.62	8.12	5.48E-04	4.82E-02
response to chemical (GO:0042221)	5130	124	63.21	1.96	1.28E-14	1.88E-11
response to stimulus (GO:0050896)	9347	189	115.18	1.64	3.79E-16	1.12E-12
xenobiotic export from cell (GO:0046618)	50	5	.62	8.12	5.48E-04	4.75E-02
plant organ formation (GO:1905393)	128	8	1.58	5.07	2.71E-04	3.19E-02
anatomical structure formation involved in morphogenesis (GO:0048646)	256	13	3.15	4.12	2.91E-05	5.04E-03
response to jasmonic acid (GO:0009753)	621	36	7.65	4.70	6.10E-14	5.99E-11
response to fatty acid (GO:0070542)	625	36	7.70	4.67	7.31E-14	6.15E-11
response to lipid (GO:0033993)	1953	64	24.07	2.66	1.28E-12	9.46E-10
response to organic substance (GO:0010033)	3557	89	43.83	2.03	6.46E-11	3.81E-08
response to oxygen-containing compound (GO:1901700)	3119	90	38.43	2.34	1.57E-14	1.85E-11
response to hormone (GO:0009725)	2532	70	31.20	2.24	2.02E-10	1.08E-07
response to endogenous stimulus (GO:0009719)	2565	70	31.61	2.21	4.52E-10	2.22E-07
floral whorl development (GO:0048438)	208	11	2.56	4.29	8.43E-05	1.34E-02
flower development (GO:0009908)	492	21	6.06	3.46	1.58E-06	4.42E-04
reproductive shoot system development (GO:0090567)	524	21	6.46	3.25	4.05E-06	1.04E-03
shoot system development (GO:0048367)	1308	32	16.12	1.99	2.87E-04	3.25E-02
response to wounding (GO:0009611)	837	43	10.31	4.17	1.01E-14	1.99E-11
response to stress (GO:0006950)	5305	132	65.37	2.02	1.24E-16	7.33E-13
glucosinolate metabolic process (GO:0019760)	226	11	2.78	3.95	1.69E-04	2.26E-02
glycosinolate metabolic process (GO:0019757)	226	11	2.78	3.95	1.69E-04	2.21E-02
secondary metabolic process (GO:0019748)	839	29	10.34	2.81	1.08E-06	3.18E-04
sulfur compound metabolic process (GO:0006790)	593	20	7.31	2.74	7.24E-05	1.18E-02
S-glycoside metabolic process (GO:0016143)	226	11	2.78	3.95	1.69E-04	2.32E-02
floral organ development (GO:0048437)	264	12	3.25	3.69	1.59E-04	2.23E-02
response to water deprivation (GO:0009414)	1019	37	12.56	2.95	9.45E-09	4.28E-06
response to water (GO:0009415)	1099	38	13.54	2.81	2.06E-08	8.08E-06
response to inorganic substance (GO:0010035)	2188	52	26.96	1.93	7.09E-06	1.67E-03
response to acid chemical (GO: 0001101)	1131	38	13.94	2.73	4.24E-08	1.56E-05
response to abiotic stimulus (GO:0009628)	4145	83	51.08	1.63	6.10E-06	1.50E-03
phyllome development (GO:0048827)	717	24	8.84	2.72	1.56E-05	3.40E-03
cellular amino acid metabolic process (GO:0006520)	576	19	7.10	2.68	1.44E-04	2.07E-02
carboxylic acid biosynthetic process (GO:0046394)	598	19	7.37	2.58	2.28E-04	2.80E-02
organic acid biosynthetic process (GO:0016053)	712	24	8.77	2.74	1.40E-05	3.16E-03
small molecule biosynthetic process (GO:0044283)	913	25	11.25	2.22	3.42E-04	3.67E-02
response to other organism (GO:0051707)	2505	56	30.87	1.81	1.66E-05	3.27E-03
biological process involved in interspecies interaction between organisms (GO:0044419)	2522	56	31.08	1.80	1.86E-05	3.42E-03
response to external biotic stimulus (GO:0043207)	2505	56	30.87	1.81	1.66E-05	3.38E-03
response to biotic stimulus (GO:0009607)	2507	56	30.89	1.81	1.68E-05	3.20E-03
response to external stimulus (GO:0009605)	2979	71	36.71	1.93	9.30E-08	3.04E-05
regulation of transcription, DNA-templated (GO:0006355)	2163	46	26.65	1.73	3.52E-04	3.71E-02
regulation of nucleic acid-templated transcription (GO:1903506)	2164	46	26.67	1.73	3.54E-04	3.66E-02
regulation of RNA biosynthetic process (GO:2001141)	2166	46	26.69	1.72	3.57E-04	3.57E-02
regulation of macromolecule biosynthetic process (GO:0010556)	2336	48	28.78	1.67	5.66E-04	4.83E-02
regulation of biosynthetic process (GO:0009889)	2574	52	31.72	1.64	4.86E-04	4.47E-02
defense response (GO:0006952)	2507	52	30.89	1.68	2.84E-04	3.28E-02
cellular response to stimulus (GO:0051716)	3901	72	48.07	1.50	4.18E-04	4.04E-02
Overrepresentation of GO terms (biological processes) was evaluated using the PANTHER Overrepresentation Test tool.
Significance was analyzed using Fisher´s exact test, and FDR (False discovery Rate) < 0.05
