# Supplementary material for: Growth Developmental Defects of Mitochondrial Iron Transporter 1 and 2 Mutants in Arabidopsis in Iron Sufficient Conditions
Source: Preprints.org preprint supplement (doi:10.20944/preprints202301.0097.v1), 2023-01-05
Supplement: Supplementary file 7 [file Supplementary table S3.xlsx]

## Sheet: Hoja1
Supplemental Table S3. Peptide transition list used for MRM MS analysis.
Protein Name	Peptide Sequence	Precursor Mz	Product Mz	Product Charge	Fragment Ion	Peptide Sequence Length	Retention Time	Height
2oxoglutarateDH_E1_AT3G55410.1	AADLGVESIVIGMSHR	552290889	58727184	1	y5	16	19.74	16901
2oxoglutarateDH_E1_AT3G55410.1	FGLEGGESLIPGMK	717868502	432227516	1	y4	14	20.81	11408
2oxoglutarateDH_E1_AT3G55410.1	IETPTPWR	500266541	656351471	1	y5	8	12.05	9472
2oxoglutarateDH_E1_AT5G65750.1	FGLEGAESLIPGMK	724876327	432227516	1	y4	14	22.3	5623
2oxoglutarateDH_E1_AT5G65750.1	LDPLGLEK	442758018	328702514	2	y6	8	13.31	21743
2oxoglutarateDH_E1_AT5G65750.1	MSGFLSENRPVQTLR	578970039	802431178	2	y14	15	12.92	11151
2oxoglutarateDH_E1_AT5G65750.1	VYYELDEER	608280043	953421067	1	y7	9	9.26	3516
51KD	GGWDNLLAIIPGGSSVPLIPK	1052593689	1051614622	1	y11	21	30.75	554
51KD	LEEIDMLQEVTK	724371074	963481559	1	y8	12	18.47	9027
51KD	STDVVDAIAR	52377747	175118952	1	y1	10	10.88	3274
ACO_AT2G05710.1	LSVPENTLYSWDPNSTYIHEPPYFK	999815023	651350074	1	y5	25	22.06	446
ACO_AT2G05710.1	SSGEDTIILAGAEYGSGSSR	97896089	970422464	1	y10	20	14.38	623
ACO_AT2G05710.1	VVNFSFDGQPAELK	775896105	557329339	1	y5	14	16.96	13685
ACO_AT2G43090.1	AVVAQSYAR	482764166	695347114	1	y6	9	4.8	2280
ACO_AT2G43090.1	FVQPGEMK	468236395	561270109	1	y5	8	7.23	3213
ACO_AT2G43100.1	AIVAESYAR	490263999	69633113	1	y6	9	6.98	450
ACO_AT2G43100.1	FIEPGENR	481240524	5722787	1	y5	8	6.2	649
ACO_AT2G43100.1	NSVATGEVFPLESEVR	578628336	829441408	1	y7	16	10.27	256
ACO_AT2G43100.1	SIGDAGPVIDAGGIFAYAR	617319614	627324922	1	y5	19	7.81	583
ACO_AT3G58990.1	AVVAESYAR	483256174	69633113	1	y6	9	4.81	866
ACO_AT4G26970.1	FSYNGQPAEIK	627311677	557329339	1	y5	11	9.25	4708
ACO_AT4G26970.1	GVISEDFNSYGSR	715830962	1161480707	1	y10	13	11.42	9782
ACO_AT4G26970.1	ILDWENTSTK	603803685	980431966	1	y8	10	11.56	28006
ACO_AT4G35830.1	ATYEAITK	448739825	43228166	1	y4	8	7.35	1853
AOX1A	ADITIDLK	444755475	589355553	1	y5	8	13.1	3640
AOX1A	DVVMVVR	409233656	603364678	1	y5	7	10.79	9113
AOX1A	LPADATLR	428747984	646351865	1	y6	8	7.5	4075
AT1G01290.1	VFDLVLANQMGK	66786048	761397435	1	y7	12	19.37	1168
AT1G04630|B16.6-1	VGENVYNSGR	547764894	5962787	1	y5	10	4.1	15961
AT1G04630|B16.6-1	WMPPATGELRPDVW	82790595	669346051	2	y12	14	21.34	29455
AT1G04630|B16.6-1	YLEYEADVMK	630794471	984434274	1	y8	10	12.44	10938
AT1G07030.1	FQEPDLR	452729792	500282723	1	y4	7	8.87	348
AT1G08480|SDH6	FMEWWER	542239469	805362764	1	y5	7	18.06	16139
AT1G08480|SDH6	LDTMAAQVK	488760235	516314023	1	y5	9	6.79	26663
AT1G08480|SDH6	LSFFENYTR	588787838	829383893	1	y6	9	16.37	14570
AT1G16700	SMNTLFLTEMVR	72136253	8954706	1	y7	12	22.59	3310
At1g17290.1|AlaAT1	ATGIVVVPGSGFR	630358962	620315085	1	y6	13	15.98	34138
At1g17290.1|AlaAT1	DLALVSFQSVSK	647356085	782404294	1	y7	12	18.49	11798
At1g17290.1|AlaAT1	ILDQIPGR	456269084	685362764	1	y6	8	9.81	73515
At1g17290.1|AlaAT1	IPAIVDR	392239795	335697763	2	y6	7	9.32	28777
AT1G22450|COX6B	EESPVEEAVSVVEEK	553936835	690366846	1	y6	15	19.25	3680
AT1G22450|COX6B	QDTSAKPVEVK	401218948	571344989	1	y5	11	3.3	20964
AT1G22450|COX6B	YVEYHR	433711402	604283785	1	y4	6	2.97	30277
AT1G51390.1	AIFAIDGVVR	530811116	876493778	1	y8	10	18.25	3457
AT1G51390.1	VFYGSDFVTVTK	681850635	1116557166	1	y10	12	15.99	1488
At1g53240|MAD1	EGLEALKPELK	409571211	486292225	1	y4	11	12.32	112244
At1g53240|MAD1	SEVVGYMGDDNLAK	499901179	732352259	1	y7	14	11.66	8820
At1g53240|MAD1	VAILGAAGGIGQPLALLMK	897039507	970575399	1	y9	19	28.43	23313
AT1G68010|HPR	FVTAYGQFLK	587318774	755408652	1	y6	10	16.81	7396
At1g72330.1|AlaAT2	AIEAAEAEK	466240189	747351925	1	y7	9	6.76	332
At1g72330.1|AlaAT2	DISLVSFQSVSK	655353542	782404294	1	y7	12	17.95	1027
At1g72330.1|AlaAT2	DVIAAGIEAR	507782556	6163413	1	y6	10	10.64	3105
At1g79010	GLSLTLK	366236721	561360639	1	y5	7	13.26	147174
At1g79010	SINTLFLTEMVR	712384319	8954706	1	y7	12	23.6	16883
At1g79010	VTINYPFEK	555795132	520276575	1	y4	9	14.57	12463
At2G07727.1|cytochrome	DVEGGWLLR	522777273	830451913	1	y7	9	17.44	41366
At2G07727.1|cytochrome	GIPNSYTDETDHT	72531006	640257296	2	y11	13	6.92	27293
At2G07727.1|cytochrome	IAFYPYFYVK	655844625	816429053	1	y6	10	22.61	9613
At2g13560.1|NAD-ME1	GTAFTMTER	507239666	637297387	1	y5	9	8.16	13106
At2g13560.1|NAD-ME1	IAAAVIK	343233982	572376623	1	y6	7	7.34	154491
At2g13560.1|NAD-ME1	IVVAGAGSAGIGVLNAAR	532645772	700410049	1	y7	18	16.94	7501
At2g13560.1|NAD-ME1	WPHVIVQFEDFQSK	587298261	624298767	1	y5	14	19.97	6452
AT2G16710.1	QVLTLTDEAASR	652346248	749342423	1	y7	12	11.02	658
AT2G21870|FAD	FQAAVDILR	516795466	757456664	1	y7	9	16.05	198733
AT2G21870|FAD	GMDLLVAEFEK	626318114	722371932	1	y6	11	21.29	57320
AT2G21870|FAD	ITLDPEDPAAVK	634840267	826430509	1	y8	12	12.84	68280
AT2G30160.1	SSSISDVFR	499251088	623314751	1	y5	9	12.22	265
AT2G31140.1	TFGPVSTADIVGR	660351334	818436657	1	y8	13	15.39	1324
AT2G31955.1	SIDTAIELGYNPVK	760403763	677361701	1	y6	14	16.97	446
AT2G33040|Gammasubunit	EVQFVIVGEK	574321514	545329339	1	y5	10	15.6	45429
AT2G33040|Gammasubunit	NVEFDALR	482248349	75037808	1	y6	8	12.29	137303
AT2G33040|Gammasubunit	QASITTELIEIISGASALEAAK	739405524	904473437	1	y10	22	32.51	17081
AT2G33040|Gammasubunit	SVVVTLSSDK	517790046	650335546	1	y6	10	9.32	55136
AT2G47380.1	GEISVVAAEE	502250754	419177255	1	y4	10	11.29	1529
AT2G47380.1	TFYDLLER	528771657	808419945	1	y6	8	17.68	112961
AT2G47510|FUM1	AAEILGR	36521632	587351137	1	y5	7	6.65	157937
AT2G47510|FUM1	AIMQAAQEVAEGK	673342651	902457787	1	y9	13	11.57	15018
AT2G47510|FUM1	EAALNLGVLTAEEFDTLVVPEK	786752812	373208161	1	y3	22	29.02	27801
AT2G47510|FUM1	SLQNFEIGGER	625312208	418204472	1	y4	11	12.4	20514
AT2G47830.1	LGLTADIGLSVAK	629374277	873504009	1	y9	13	18.78	92
AT3G01280|VDAC1	EDLIASLTVNDK	659348457	847451973	1	y8	12	16.93	20712
AT3G01280|VDAC1	FSITTFSPAGVAITSTGTK	943498923	1102610265	1	y12	19	21.17	7570
AT3G01280|VDAC1	INAGLSFTK	475768917	723403566	1	y7	9	11.4	96151
AT3G01280|VDAC1	SFFTISGEVDTK	6658299	735351925	1	y7	12	16.57	34858
At3G10920|MSD1	GSLGSAIDAHFGSLEGLVK	619995019	802466895	1	y8	19	20.8	3150
At3G10920|MSD1	LVVDTTANQDPLVTK	538629677	557365724	1	y5	15	13.16	16779
AT3G15660|Glutaredoxin	GEFIGGSDIILNMHK	815916515	1184609219	1	y11	15	17.66	464
AT3G15660|Glutaredoxin	NILEDQELK	551292953	874451639	1	y7	9	10.53	28746
AT3G15660|Glutaredoxin	SFSHWPTFPQIFIK	867953758	1090629543	1	y9	14	24.18	429
AT3G15660|Glutaredoxin	VLQQYNVPISSR	702385708	559319837	1	y5	12	11.32	11477
AT3G15660|Glutaredoxin	VPPDSTDSLK	529771853	480237647	2	y9	10	15.79	122589
AT3G20970.1	DTAISEDDSETVAMIK	862898382	1324593688	1	y12	16	13.28	412
AT3G20970.1	SIYSIDGVVR	554803488	908483607	1	y8	10	13.95	5421
AT3G27240	FANGGAYPPDLSLITK	832438137	983577174	1	y9	16	19.48	4035
AT3G27240	FPQPYANESAAR	675825483	978463935	1	y9	12	8.7	1133
AT3G27240|cytochrome	DIVSFLAWAAEPEMEER	664983902	79033998	1	y6	17	29.49	9972
AT3G27380	MASGLIGR	402723455	175118952	1	y1	8	7.85	714
At3G46560|TIM9	FAELNQNAPTQD	674312405	460203804	1	y4	12	9.08	5008
At3G46560|TIM9	MASMIDQLQLR	653336315	772431178	1	y6	11	17.55	10864
At3G46560|TIM9	MYNSLVER	506250034	717388979	1	y6	8	8.34	20517
AT3G52300.1	AFDEVNTQLQTK	697351531	832452307	1	y7	12	9.77	14425
AT3G52300.1	FDALLVELK	524307875	785513117	1	y7	9	20.29	82039
AT3G52300.1	IADVAFK	382221071	650350802	1	y6	7	9.21	238224
AT3G52300.1	TIDWDGMAK	518742042	822345065	1	y7	9	12.29	68233
AT3G54110.1	ALWTGLGPNVAR	627851304	613341635	1	y6	12	17.06	24374
AT3G54110.1	GLLGTVGTIAR	529321848	774446828	1	y8	11	15.76	47328
AT3G54110.1	GVVPGLHR	417750861	579336155	1	y5	8	6.86	17940
AT3G54110.1	YSGALNAYSTIVR	707869891	923494506	1	y8	13	14.7	1570
AT3G61440|CYSC	DASLLIGK	40874491	630418488	1	y6	8	11.75	619169
AT3G61440|CYSC	DRPAIAMIADAEK	467578259	533256568	1	y5	13	13.23	227161
AT3G61440|CYSC	IIMTMPSYTSLER	514594922	605325316	1	y5	13	18.42	34337
AT3G61440|CYSC	TPLVFLNK	466284203	415760364	2	y7	8	15.85	659886
At4g00570.1|NAD-ME2	AVVQFEDFQAK	641327327	884414859	1	y7	11	14.34	9883
At4g00570.1|NAD-ME2	GEPENVVALAK	56380877	470776742	2	y9	11	10.84	54500
At4g00570.1|NAD-ME2	GILYPSINNIR	630358962	813457727	1	y7	11	16.78	23633
At4g00570.1|NAD-ME2	IVVVGAGSAGLGVTK	664400827	917505071	1	y11	15	14.02	11561
AT4G02580.1	DIESALLDHLGVK	470592674	781456664	1	y7	13	22.11	3480
AT4G02580.1	VIEVAPIR	448781827	684403901	1	y6	8	11.97	193368
AT4G02580.1	VVEIVEK	408247286	617350468	1	y5	7	7.11	158392
AT4G05020.2	ASLPELSDEER	623301506	487724903	2	y8	11	10.58	5472
AT4G05020.2	VMEDVSAIFSK	613310289	995504403	1	y9	11	16.99	663
AT4G05450.1	ITIIFVDK	474791861	734444703	1	y6	8	18.09	440
AT4G12130.1	IAAGAEVVESGTGK	644840799	449235438	1	y5	14	7.16	162
AT4G12130.1	NLTGSSSVGWGGGVDR	774873693	803379477	1	y8	16	11.26	169
AT4G19540.1	AYQDLAQNVVK	624832777	65838825	1	y6	11	10.66	421
AT4G19540.1	LIGEIPLEMSIR	685889237	84545495	1	y7	12	22.26	1376
AT4G22220.1	AMEDVLTIK	510275717	81746656	1	y7	9	14.43	20359
AT4G29480.1	QYIQEPATVEK	653337892	644361367	1	y6	11	7.72	42655
AT4G32360.1	LVTWEDLLAAAAN	693866817	133060768	1	y1	13	28.47	386
AT4G32470.1	DLQAVQTPFR	587814387	818451913	1	y7	10	13.73	31411
AT4G32470.1	GYLQDMLALVER	704368669	946502628	1	y8	12	27.01	19408
AT4G32470.1	YDDLYDQYYSMDIK	916390192	1162508502	1	y9	14	16.95	609
AT4G33010|GDC-P-1	HYPVLFR	466261062	631392608	1	y5	7	11.78	214923
AT4G33010|GDC-P-1	IIGISVDSSGK	538303321	849431238	1	y9	11	11.65	226031
AT4G33010|GDC-P-1	LGVAEVQELPFFDTVK	896480002	853445431	1	y7	16	25.39	6582
AT4G37910.1	GVNPDEAVAMGAAIQGGILR	970006924	95556834	1	y10	20	21.42	389
AT4G37910.1	NSADTTIYSVEK	664322439	1055525532	1	y9	12	8.28	3221
AT4G37910.1	QAVTNPTNTIFGSK	739385905	964509822	1	y9	14	13.07	3424
AT4G37930|AHM	AYQEQVLSNSAK	669338423	619340966	1	y6	12	6.35	36586
AT4G37930|AHM	GFVEEDFAK	521248014	837398875	1	y7	9	11.35	89655
AT4G37930|AHM	SATLFRPK	460271627	547335093	1	y4	8	6.51	50573
AT5G03905.1	GATIDYEEELIR	704851363	1066505131	1	y8	12	15.25	992
AT5G03905.1	LVVDNVSYDLVK	682377017	724387582	1	y6	12	16.67	1938
At5g07440.1|GDH2	DLSLSELER	531277303	833436323	1	y7	9	15.03	169002
At5g07440.1|GDH2	GVVFATEALLAEYGK	523283729	567277303	1	y5	15	22.78	27763
At5g07440.1|GDH2	TAVADIPYGGAK	58180877	592308937	1	y6	12	10.16	103693
AT5G08670.1	FTQANSEVSALLGR	746891354	616377686	1	y6	14	16.26	71734
AT5G08670.1	IPSAVGYQPTLASDLGALQER	729386575	673362764	1	y6	21	20.18	180410
AT5G08670.1	QISELGIYPAVDPLDSTSR	1031028576	1157579693	1	y11	19	21.16	3736
AT5G09590.1	TTPSVVAFNTK	582816595	580308937	1	y5	11	11.38	4457
AT5G09590.1	VQSIVAEIFGK	595842613	763434866	1	y7	11	22.39	11876
AT5G11770.1	AAEFVISK	43274491	234144832	1	y2	8	9.82	15367
AT5G11770.1	VDDLMNWAR	560266215	677318791	1	y5	9	15.85	17294
AT5G11770.1	VYDQMPEPR	567766048	872393078	1	y7	9	7.51	2504
AT5G13430	AFAYFVLSGGR	594314023	7354148	1	y7	11	19.54	8010
AT5G13430	FVYASVLR	477774002	708403901	1	y6	8	14.52	32914
AT5G13430	LANSVDVGSLR	565811844	646351865	1	y6	11	10.47	20134
AT5G13450.1	ELTETLQEIIGAGK	751409046	332192845	1	y4	14	21.54	25957
AT5G13450.1	NFLSLLAENGK	60332987	831457058	1	y8	11	20.78	12380
AT5G13450.1	TAPIFAQFTK	562310949	741393001	1	y6	10	17.39	50972
AT5G13450.1	VLDMSIR	417231113	621302472	1	y5	7	11.55	572794
AT5G14040.1	SISSGFGILLK	561331881	921540394	1	y9	11	20.46	152375
AT5G14040.1	TYSDLAGPEYTAK	708338089	765377745	1	y7	13	9.07	6436
AT5G14040.1	VFVGLPTTGGVAPAPAIAATEAK	1069596429	1039578236	1	y11	23	21.01	1129
AT5G15090.1	GSLFLGDVATQVK	667869359	817441408	1	y8	13	17.83	51193
AT5G15090.1	HFNAGFNFTK	591788172	898441743	1	y8	10	11.65	7580
AT5G15090.1	SFFTVSGEVDSK	65181425	721336274	1	y7	12	14.2	29374
At5g18170.1|GDH1	DGIDIPALLK	527810782	541370809	1	y5	10	22.09	3899
At5g18170.1|GDH1	IVAVSDITGAIK	593855721	974551687	1	y10	12	16.5	35698
At5g18170.1|GDH1	LSISELER	473763831	63332023	1	y5	8	12.72	42948
AT5G37510|75kDa	ATETIDVSDAVGSNIR	549944324	546299435	1	y5	16	13.08	18836
AT5G37510|75kDa	FASEVAGVQDLGILGR	816441211	1098626583	1	y11	16	20.37	6109
AT5G37510|75kDa	NPAIIVGAGLFNR	671385511	734394398	1	y7	13	20.36	14134
AT5G37510|75kDa	VHFSNPEDAIEVFVDGYAVK	746035542	997535309	1	y9	20	24.8	11945
AT5G40810.1	DVVSFLSWAAEPEMEER	997961848	79033998	1	y6	17	26.26	905
AT5G40810.1	FANGGAYPPDLSLVTK	825430312	969561523	1	y9	16	17.9	2080
AT5G47030.1	GLAEFQQK	460745442	75037808	1	y6	8	7.2	99754
AT5G47030.1	LASATTDLEK	524779679	864430903	1	y8	10	6	85521
AT5G47030.1	LTVNFVLPYTSELTGK	891487827	995504403	1	y9	16	24.56	16043
AT5G57490.1	DDFFFGDISTLYK	784369389	896472374	1	y8	13	25.48	684
AT5G58270.1	ETIQSLVDMK	582302464	278153288	1	y2	10	15.31	471
AT5G58270.1	ILDGISFVVPAGK	658384645	372224145	1	y4	13	21.25	1554
AT5G65720.1	ALGVDEDMAHTSIR	757867022	1174515712	1	y10	14	10.5	180
AT5G65720.1	EIVFVSGATEANNMAVK	890450919	1192562663	1	y12	17	15.98	796
AT5G65720.1	HLQQEGFEVTYLPVK	894469969	343233982	1	y3	15	16.74	475
AT5G65720.1	TDGLVDLEMLR	63132647	776397101	1	y6	11	20.32	11270
AT5G66760|SDH1-1	AVIELENYGLPFSR	80442503	506272158	1	y4	14	22	33582
AT5G66760|SDH1-1	IMQNNAAVFR	582303132	91947444	1	y8	10	9.56	11614
AT5G66760|SDH1-1	SMTMEIR	434206781	649333772	1	y5	7	8.86	84317
AT5G66760|SDH1-1	TIAWLDR	437742702	660346386	1	y5	7	14.17	165773
AT5G67500.1	GPGLFTDIGK	502774199	680361367	1	y6	10	15.06	42820
AT5G67500.1	IDTDSSVLTTVTLTEILPSTK	745405301	432245275	1	y4	21	25.7	28060
AT5G67500.1	SLVTVSSEIDTK	639843007	979494232	1	y9	12	11.99	38723
ATMG00160|COX2	LLEVDNR	429737617	632299829	1	y5	7	7.02	339761
ATMG00160|COX2	LNQISILVQR	592361504	7154461	1	y6	10	15.8	76980
CAA69752.3	FGYEVSFEALDK	702837725	80940396	1	y7	12	18.76	2804
CAA69752.3	GAIEILGPYGISYTFR	878967062	1160573485	1	y10	16	24.4	2899
CAA69752.3	LYSFFNK	459739628	642324588	1	y5	7	15.02	16077
cox1	WLFSTNHK	344846898	58629435	1	y5	8	11.91	973
CS4_AT2G44350.1	LYEVVPPVLTELGK	778950349	953566609	1	y9	14	24.38	36566
CS4_AT2G44350.1	SQLQELIPEQQDR	792404826	772358407	1	y6	13	13.57	17688
CS4_AT2G44350.1	VPVVAAYVYR	568826766	74238825	1	y6	10	14.93	41330
FER4	SSTTDALSGVVFEPFK	84292506	391233982	1	y3	16	21.99	41
FRATAXIN	LGSLGTYVLNK	582834788	79444068	1	y7	11	14.42	2072
FUM_AT5G50950.1	IYQLAQGGTAVGTGLNTK	597991497	69037808	1	y7	18	13.25	21604
FUM_AT5G50950.1	LLHESLMLVTSLNPK	847979115	734895051	2	y13	15	19.38	2575
ICDH_AT1G54340.1	ATDLIVNEPGK	578814053	301187031	1	y3	11	9.49	680
ICDH_AT3G09810.1	ENTEGEYSGLEHQVVK	606955	673340966	2	y12	16	9.15	8131
ICDH_AT3G09810.1	TADLGGSSTTTDFTK	751354467	1101505859	1	y11	15	8.46	1762
ICDH_AT3G09810.1	YPEIYYEK	55276604	471234376	2	y7	8	10.43	5318
ICDH_AT5G03290.1	TDGLFLK	397226354	577370809	1	y5	7	12.73	75931
ICDH_AT5G03290.1	TQSFLTWESLESVR	841922851	1106547664	1	y9	14	21.59	3594
ICDH_AT5G03290.1	VFTTAGVPIEWEEHYVGTEIDPR	882434254	985468154	2	y16	23	21.23	5640
ICDH_AT5G14590.1	DLALLIHGPK	538826766	664414071	1	y6	10	16.42	2016
ICDH1_AT4G35260.1	DLGGTSTTQEVVDAVIAK	601982667	715434866	1	y7	18	19.34	9400
ICDH1_AT4G35260.1	TPVGGGVSSLNVQLR	49527909	629372935	1	y5	15	14.56	19127
ICDH1_AT4G35260.1	YDVHGEMSR	365162557	579255522	1	y5	9	3.89	6255
ICDH2_AT2G17130.1	SLPEGLLESIK	593339903	493281857	2	y9	11	19.61	14959
ICDH2_AT2G17130.1	TPVGGGVSSLNVNLR	735407172	1172638211	1	y12	15	14.39	2094
MDH2_AT3G15020.1	NLSIAIAK	415260728	602387188	1	y6	8	12.13	48921
MDH2_AT3G15020.1	SQVSGYMGDDDLGK	736322113	115747793	1	y11	14	9.1	1625
MDH2_AT3G15020.1	VVILGAAGGIGQPLSLLMK	613037502	986570314	1	y9	19	28.09	2742
MPC1	FAWMVQPR	517765654	499298707	1	y4	8	16.55	7847
MPC1	FQAFLNSPIGPK	659861337	1043588407	1	y10	12	17.88	22531
MPC2/NGRA1	LQALWNHPAGPK	444578811	469276909	1	y5	12	10.27	8913
MPC2/NGRA1	TIHFWAPTFK	416557236	49228166	1	y4	10	17.9	37393
MPC2/NGRA1	YSTVITPK	454758018	658413403	1	y6	8	7.41	602
NP_001077919.1	LVQLQSK	408252903	603346051	1	y5	7	5.8	97865
NP_001077919.1	QYIQEPATIEK	660345717	658377017	1	y6	11	9.17	7352
PDH_AT1G54220.1	ADIDEYLASSGK	634803882	969452367	1	y9	12	11.58	2564
PDH_AT1G54220.1	APALDYVDIPHSQIR	565633533	737405297	1	y6	15	15.18	4293
PDH_AT1G54220.1	VFASPLAR	43075307	614362036	1	y6	8	11.38	58496
PDH_AT1G54220.1	VVDGAIGAEWLK	62934552	1059546936	1	y10	12	17.25	8063
PDH_AT3G13930.1	GYIETPESMLL	626810121	689353839	1	y6	11	23.17	5206
PDH_AT3G13930.1	IFASPLAR	437760895	614362036	1	y6	8	12.71	212199
PDH_AT3G13930.1	VPALDYVDIPHTQIR	579649183	751420948	1	y6	15	17.15	25816
PDH_AT3G52200.1	ILVTEGSK	423750193	620324982	1	y6	8	5.71	108863
PDH_AT3G52200.1	MNVTLSADHR	381857357	312177864	1	y2	10	6.67	4482
PDH_AT3G52200.1	NVPATIEGGR	507272355	800426093	1	y8	10	6.03	5144
PDH_DLD_AT1G48030.1	AIDNAEGLVK	515282388	845436323	1	y8	10	8.88	75185
PDH_DLD_AT1G48030.1	FISPNEVSVETIDGGNTIVK	1060049509	1332700536	1	y13	20	18.74	147
PDH_DLD_AT1G48030.1	GIEGLFK	382221071	593329339	1	y5	7	14.44	218828
PDH_DLD_AT3G17240.1	EGVSYNVGK	476740356	667340966	1	y6	9	5.34	14571
PDH_DLD_AT3G17240.1	FLSPSEVSVDTIDGENVVVK	1067549341	893957088	2	y17	20	19.52	150
PDH_DLD_AT3G17240.1	LGSEVTVVEFAADIVPAMDGEIR	806745552	888424378	1	y8	23	29.73	6198
PDH_DLD_AT3G17240.1	VPGVVYTYPEVASVGK	832948338	786435595	1	y8	16	16.21	148
PDH_DLST_AT4G26910.1	AAVSALQHQPVVNAVIDGDDIIYR	85545376	1079536765	1	y9	24	19.9	14365
PDH_DLST_AT4G26910.1	EAVYFLR	449245078	598334758	1	y4	7	14.16	145431
PDH_DLST_AT4G26910.1	IPETTDTKPSPPAEDK	575956229	656324982	1	y6	16	5.13	784
PDH_DLST_AT5G55070.1	ISTSADAVSHVAPSEK	533605531	460240189	1	y4	16	6.82	7215
PDH_DLST_AT5G55070.1	TINGLAK	358718696	502298373	1	y5	7	4.87	50806
PDH_E1_AT1G59900.1	GFGTESFGPDR	585264727	678320565	1	y6	11	10.31	3609
PDH_E1_AT1G59900.1	GGSLHEVFSELMGR	506917164	3631809	1	y3	14	19.62	56181
PDH_E1_AT1G59900.1	SVESSSQELLDFFR	548601898	584282723	1	y4	14	24.1	21316
PDH_E1_AT1G59900.1	VDGMDAFAVK	526757692	838412751	1	y8	10	13.04	19559
PDH_IAR1_AT1G24180.1	LLLTHDIATEK	418574844	407208692	2	y7	11	10.68	24098
PDH_IAR1_AT1G24180.1	LVDAFSELMGR	619315905	1025472057	1	y9	11	20.47	58462
PDH_IAR1_AT1G24180.1	NGPIILEMDTYR	711358301	927424044	1	y7	12	18.16	9698
PDH_IAR1_AT1G24180.1	SVETSSEEILAFFR	53893851	653376957	1	y5	14	25.12	8300
PDH_MAB1_AT5G50850.1	ATINASVR	416237784	546299435	1	y5	8	4.74	172851
PDH_MAB1_AT5G50850.1	LAEEGISAEVINLR	757414662	901510157	1	y8	14	17.6	24651
PDH_MAB1_AT5G50850.1	LALPQIEDIVR	633874445	485271824	2	y8	11	22.29	394058
PDH_MAB1_AT5G50850.1	VLAPYSAEDAR	596303852	908410836	1	y8	11	8.29	46736
SDH_AT5G62575.1	ALLAEDSALKR	396231188	445240524	2	y8	11	8.9	23616
SDH2_AT3G27380.1	NEMDPSLTFR	605282062	720403901	1	y6	10	13.27	1430
SDH2_AT3G27380.1	WNPDNPGKPELQNYQIDLK	757046442	985004904	2	y17	19	15.3	10221
SDH5_AT1G47420.1	AAEAVEEFGGILTSIK	545626044	561360639	1	y5	16	23.05	11701
SDH5_AT1G47420.1	VEMELGTK	453733685	678349088	1	y6	8	7.94	18252
SDH5_AT1G47420.1	VTVLGTSGLSGSYVEQR	584975735	531288536	1	y4	17	14.63	10386
SDH7_1_AT3G47833.1	ALLAEDASLR	529795663	761378808	1	y7	10	11.88	21026
SDHaf2_AT5G51040.1	AAAGQPWVR	478259051	557319443	1	y4	9	7.86	3741
SDHaf2_AT5G51040.1	SLIHVLNLENPDLWK	597664833	658355888	1	y5	15	22.35	3296
sp|P92983.2|PROD1_ARATH	YMPFGPVATAIPYLLR	904992025	661403172	1	y5	16	22.67	59
succinyl_CoA_synthetase_AT2G20420.1	AIQDVFPNESELVVK	844448702	1014546602	1	y9	15	18.9	20921
succinyl_CoA_synthetase_AT2G20420.1	LITADDLDDAAEK	695340829	1163506253	1	y11	13	11.42	64934
succinyl_CoA_synthetase_AT2G20420.1	VPIDVFAGITDEDAAK	554285798	749331189	1	y7	16	20.8	12590
succinyl_CoA_synthetase_AT5G08300.1	ASGTEKPVVAFIAGLTAPPGR	680380984	426245943	1	y4	21	21.98	87060
succinyl_CoA_synthetase_AT5G08300.1	SLNDAGVK	402216517	603309666	1	y6	8	5.36	57647
succinyl_CoA_synthetase_AT5G23250.1	FFVDPQTEGIVLIGEIGGTAEEDAAALIK	1001856888	1245632122	1	y13	29	32.69	1772
