# Supplementary material for: Growth Developmental Defects of Mitochondrial Iron Transporter 1 and 2 Mutants in Arabidopsis in Iron Sufficient Conditions
Source: Preprints.org preprint supplement (doi:10.20944/preprints202301.0097.v1), 2023-01-05
Supplement: Supplementary file 8 [file Supplementary table S4.xlsx]

## Sheet: quantitative data
Supplemental Table S4. Normalized abundance of mitochondrial peptides measured using MRM-MS.
Protein Name / AGI	Wild Type Rep 1	Wild Type Rep 2	Wild Type Rep 3	Wild Type Rep 4	Compensated Rep 1	Compensated Rep 2	Compensated Rep 3	Compensated Rep 4	t-ratio	p-value	Significant?
2oxoglutarateDH_E1_AT3G55410.1	1.05424	0.795406	1.01035	0.918127	1.1146	0.988091	1.13721	0.981975	0.949873	0.342314
2oxoglutarateDH_E1_AT3G55410.1	1.12298	0.797625	1.16083	0.994864	1.00412	0.933252	1.10293	0.883393	0.32664	0.743981
2oxoglutarateDH_E1_AT3G55410.1	1.15277	1.06456	0.599659	1.12423	0.923853	1.09223	0.917693	1.12501	0.251637	0.801353
2oxoglutarateDH_E1_AT5G65750.1	1.09518	0.81638	1.15843	1.25803	0.87032	0.678285	1.29446	0.828919	1.4043	0.160415
2oxoglutarateDH_E1_AT5G65750.1	1.04718	0.878081	1.03301	0.977511	1.08227	0.903215	0.983974	1.09476	0.274963	0.783378
2oxoglutarateDH_E1_AT5G65750.1	0.852452	0.857477	1.08234	1.06878	1.00259	0.807928	1.22596	1.10247	0.594877	0.552006
2oxoglutarateDH_E1_AT5G65750.1	1.103	0.818912	0.75481	1.20738	1.1105	0.880144	1.16829	0.956961	0.496169	0.619841
51KD	0.972658	0.876586	0.843798	0.93411	1.06942	1.10093	1.21689	0.985605	1.59623	0.110625
51KD	1.12039	0.93327	0.867096	1.05115	0.939307	1.23071	0.814767	1.0433	0.120242	0.904306
51KD	1.0506	1.07042	0.832614	0.972857	0.89489	1.19298	0.849057	1.13658	0.314708	0.753023
ACO_AT2G05710.1	1.04701	0.860209	0.555296	1.8499	0.756689	0.925427	0.926547	1.07892	1.33751	0.181237
ACO_AT2G05710.1	0.927205	1.02227	0.704421	1.26207	0.935843	1.03875	0.856456	1.25298	0.359764	0.719069
ACO_AT2G05710.1	0.922229	0.55518	1.16459	1.32996	0.857239	1.08687	0.84682	1.23711	0.120065	0.904446
ACO_AT2G43090.1	0.943331	0.736477	1.00433	1.20826	1.18169	0.875341	1.22599	0.824577	0.460654	0.645106
ACO_AT2G43090.1	1.21245	0.645846	0.868311	1.11718	0.978082	0.77898	1.54812	0.851023	0.668748	0.503748
ACO_AT2G43100.1	1.09725	0.776516	0.954323	0.789576	1.23664	1.00225	1.17791	0.965526	1.63683	0.101854
ACO_AT2G43100.1	1.25092	0.736828	0.728882	0.555441	1.5161	1.29269	1.04439	0.874753	3.11642	0.00186171
ACO_AT2G43100.1	0.87489	0.867556	1.01705	1.2207	1.18562	0.861933	0.854352	1.1179	0.0848144	0.932419
ACO_AT2G43100.1	1.22155	0.910439	1.29595	0.671357	0.985046	0.798322	1.00971	1.10763	0.425118	0.670805
ACO_AT3G58990.1	0.969373	0.643285	1.07315	1.08523	1.07646	0.864118	1.35994	0.928444	0.980247	0.327106
ACO_AT4G26970.1	0.937903	1.01444	1.09083	1.08205	1.14033	0.800168	1.04483	0.889448	0.536101	0.59196
ACO_AT4G26970.1	1.26373	0.786859	1.12665	0.960905	0.840464	1.16068	0.901093	0.959617	0.591427	0.554314
ACO_AT4G26970.1	0.94292	0.990289	1.20146	1.00465	0.941475	0.791441	1.02712	1.10065	0.596427	0.550971
ACO_AT4G35830.1	1.39106	0.809665	0.808028	0.815683	1.03188	1.09971	1.01957	1.02441	0.751621	0.452385
AOX1A	0.823943	0.778957	1.05375	1.31325	0.930144	0.683758	1.36379	1.05241	0.128873	0.897474
AOX1A	0.940578	0.762919	1.20754	1.35576	1.01415	0.729762	1.078	0.911281	1.14222	0.253527
AOX1A	0.858752	0.624126	1.04949	1.58777	1.15414	0.712931	1.1823	0.830481	0.514344	0.60708
AT1G01290.1	0.942653	0.956203	0.851012	0.974248	1.05723	0.979199	1.13736	1.10209	1.18112	0.237724
AT1G04630|B16.6-1	1.04182	0.827044	0.81874	0.944529	1.12866	0.907	1.21663	1.11557	1.57489	0.115471
AT1G04630|B16.6-1	1.18362	0.846393	0.977499	0.763676	1.28057	0.817539	1.05198	1.07873	0.97961	0.32742
AT1G04630|B16.6-1	1.00525	1.05781	1.17395	0.823431	0.955634	0.85876	1.03859	1.08658	0.25876	0.795852
AT1G07030.1	1.2716	1.8703	1.66696	1.30471	0.533922	0.221428	0.673266	0.45781	9.04862	3.90991e-19	*
AT1G08480|SDH6	0.965173	1.05041	1.17718	0.957451	1.04692	0.811773	1.02907	0.96202	0.643077	0.520262
AT1G08480|SDH6	0.937883	0.92409	0.983859	0.968156	0.967048	1.06533	1.22516	0.928474	0.796349	0.425942
AT1G08480|SDH6	0.95462	1.03187	1.12985	1.0409	1.00238	0.83781	1.07713	0.925437	0.673209	0.500907
AT1G16700	1.02462	1.13987	1.01119	0.754671	1.06688	1.03986	1.06697	0.895931	0.298195	0.765592
At1g17290.1|AlaAT1	0.803418	0.915781	1.01855	1.07325	1.18079	0.863495	1.22199	0.92272	0.809127	0.418557
At1g17290.1|AlaAT1	1.14748	0.864144	0.948126	1.22846	1.04819	0.849014	0.968479	0.946105	0.805751	0.420501
At1g17290.1|AlaAT1	1.02032	0.983963	1.01362	1.35617	0.907872	0.790298	1.16666	0.761094	1.60149	0.109458
At1g17290.1|AlaAT1	0.912149	0.856294	0.928404	1.43394	1.02488	0.884463	0.883378	1.07649	0.559945	0.575592
AT1G22450|COX6B	0.910099	1.08614	1.04558	0.927782	1.25407	0.94969	0.8697	0.95694	0.130136	0.896474
AT1G22450|COX6B	1.07297	1.10624	0.882297	0.927482	0.836211	1.09686	0.92344	1.1545	0.0471236	0.96242
AT1G22450|COX6B	1.05502	1.17154	1.03055	0.906988	0.85533	0.964488	1.0392	0.976886	0.702512	0.482457
AT1G51390.1	1.09743	0.924867	0.995271	1.13875	0.961693	0.952649	1.00624	0.923109	0.669209	0.503454
AT1G51390.1	1.10948	0.981369	1.01999	1.20069	1.02045	0.836873	0.923042	0.908112	1.3337	0.182485
At1g53240|MAD1	0.97642	1.04298	0.793163	0.781015	1.01881	1.23612	0.824358	1.32713	1.73999	0.0820444
At1g53240|MAD1	0.815164	1.01694	0.716555	1.13714	1.00439	1.19885	0.939391	1.17157	1.34516	0.178756
At1g53240|MAD1	1.05536	1.11329	0.775106	1.17182	0.940054	1.2338	0.719639	0.990929	0.494818	0.620793
AT1G68010|HPR	0.8532	1.97964	0.762982	0.610354	0.678953	1.62136	0.847144	0.646366	0.882675	0.377538
At1g72330.1|AlaAT2	0.731574	0.939055	1.00111	0.706032	1.06515	1.41658	0.991232	1.14926	2.66387	0.00779891
At1g72330.1|AlaAT2	1.05623	1.1026	0.834682	1.12412	1.1045	0.816037	0.952162	1.00966	0.503641	0.61458
At1g72330.1|AlaAT2	0.835027	0.926164	1.04408	1.06033	0.924888	1.07539	1.04751	1.08661	0.575386	0.565108
At1g79010	1.099	1.17954	0.947142	0.921554	0.890661	0.99259	0.878556	1.09097	0.630314	0.528575
At1g79010	1.15111	1.01871	0.962575	0.806457	1.04219	0.992336	0.987776	1.03885	0.261814	0.793497
At1g79010	1.09007	0.993301	0.936831	0.782408	1.02911	1.03204	1.1104	1.02584	0.845069	0.398193
At2G07727.1|cytochrome	1.13047	0.834535	1.33812	0.882561	1.09587	0.87996	0.824494	1.01399	0.794937	0.426763
At2G07727.1|cytochrome	1.29491	0.925387	0.833438	0.872612	1.22274	0.968604	0.903342	0.978959	0.315302	0.752571
At2G07727.1|cytochrome	0.976783	1.00593	1.17184	0.806114	0.928125	1.07072	0.959653	1.08083	0.168381	0.866304
At2g13560.1|NAD-ME1	0.955374	0.897919	1.06854	1.06169	1.06549	0.95281	1.06791	0.930266	0.0705166	0.943791
At2g13560.1|NAD-ME1	1.04076	0.885963	1.03658	0.946967	1.2359	0.953647	0.97867	0.921511	0.384161	0.700908
At2g13560.1|NAD-ME1	0.9687	1.22391	0.916776	1.22746	1.03336	0.744305	0.731046	1.15444	1.4421	0.14946
At2g13560.1|NAD-ME1	0.987848	1.11429	0.941167	0.990551	1.06175	0.922559	1.06032	0.921514	0.144936	0.884779
AT2G16710.1	1.06436	1.14027	1.09526	1.01553	0.89321	0.912028	0.911589	0.967759	1.35036	0.177084
AT2G21870|FAD	1.25011	0.859136	1.22367	0.98639	0.988651	0.807595	0.978038	0.906415	1.36699	0.171811
AT2G21870|FAD	0.977893	1.01325	1.00472	1.04931	1.18556	0.821945	0.918858	1.02847	0.193378	0.846686
AT2G21870|FAD	0.956815	1.09785	0.855504	1.04194	1.11606	0.937409	1.05172	0.942716	0.205055	0.837554
AT2G30160.1	1.70786	2.09853	1.84311	1.91256	0.0766502	0.127351	0.0649397	0.169003	15.2499	0	*
AT2G31140.1	1.18823	1.0797	0.76548	0.943295	1.15277	1.10896	0.830668	0.930908	0.0997613	0.920546
AT2G31955.1	1.03059	1.11147	0.782305	1.14746	0.86374	1.34243	0.736768	0.985238	0.307476	0.758519
AT2G33040|Gammasubunit	0.812572	1.00986	1.11132	0.878127	1.01165	0.976148	1.15027	1.05005	0.805388	0.42071
AT2G33040|Gammasubunit	1.07696	1.04601	0.963352	1.05249	1.04831	0.880755	1.05759	0.874537	0.594245	0.552429
AT2G33040|Gammasubunit	0.980401	0.87346	0.863002	1.03956	0.993812	1.10754	1.09143	1.0508	1.04282	0.297184
AT2G33040|Gammasubunit	1.1472	0.883365	0.879131	0.96782	1.07609	0.912373	1.16189	0.972132	0.524364	0.600095
AT2G47380.1	1.22697	1.0131	1.46133	0.712529	1.01099	0.702994	0.968003	0.904086	1.7721	0.0765594
AT2G47380.1	1.03433	0.914187	1.20693	0.927978	0.981513	0.909142	0.994913	1.03101	0.357154	0.721021
AT2G47510|FUM1	1.02732	0.858317	0.964288	1.13932	0.835914	1.03159	1.00448	1.13877	0.0460584	0.963269
AT2G47510|FUM1	0.997999	0.857185	1.03811	0.894433	1.37652	0.82868	0.983178	1.02389	0.908797	0.363588
AT2G47510|FUM1	1.15003	0.893953	0.913261	0.958504	1.16978	0.933934	0.879211	1.10133	0.360681	0.718383
AT2G47510|FUM1	1.00806	0.991113	0.946987	1.02826	1.03202	0.97273	1.00641	1.01442	0.109521	0.912802
AT2G47830.1	0.958895	0.762124	0.619632	0.936552	1.14222	1.00232	1.51534	1.06291	3.09444	0.00200448
AT3G01280|VDAC1	0.912393	1.41601	0.873331	0.853918	0.917475	1.13362	0.931507	0.961749	0.238265	0.811705
AT3G01280|VDAC1	0.967928	1.03319	0.979177	1.14778	1.07297	0.902902	0.908662	0.987389	0.548326	0.583541
AT3G01280|VDAC1	1.19292	0.926981	1.00177	0.793665	1.19847	1.06588	0.775147	1.04516	0.362448	0.717063
AT3G01280|VDAC1	1.18771	1.19493	0.713404	1.04475	0.899428	1.16489	0.712667	1.08223	0.602717	0.546779
At3G10920|MSD1	0.754488	1.22123	1.11629	1.03623	0.96375	1.02177	1.01817	0.868084	0.548967	0.583101
At3G10920|MSD1	0.963303	1.18479	0.946911	1.04818	0.965658	1.03898	0.71996	1.13222	0.61301	0.539953
AT3G15660|Glutaredoxin	1.31406	1.0198	0.947164	1.04333	0.966046	0.914382	0.625061	1.17015	1.38863	0.165129
AT3G15660|Glutaredoxin	0.874598	1.24163	0.893525	1.00522	1.10786	1.09513	0.898399	0.883634	0.0641133	0.948888
AT3G15660|Glutaredoxin	0.733083	1.55115	0.988128	0.772202	0.895724	1.45346	0.955538	0.650716	0.190778	0.848723
AT3G15660|Glutaredoxin	1.12803	1.02443	1.10905	1.02592	0.9717	0.904081	0.955721	0.881066	1.23055	0.218663
AT3G15660|Glutaredoxin	0.9619	1.12267	0.843242	1.11766	1.05491	1.19616	0.743047	0.960406	0.194697	0.845654
AT3G20970.1	1.10791	1.02133	1.02546	0.920387	0.983564	1.05189	0.925968	0.963494	0.321448	0.747911
AT3G20970.1	1.03214	1.29086	0.785425	1.08703	1.02793	1.07257	0.735658	0.968385	0.836766	0.402843
AT3G27240	0.957035	0.755652	0.981076	0.724054	0.998167	1.10608	1.17761	1.30032	2.49244	0.0127828
AT3G27240	1.09246	0.816638	0.825293	0.93792	1.03733	1.13956	1.14445	1.00634	1.40289	0.160835
AT3G27240|cytochrome	0.923605	0.82116	1.10959	0.750884	1.07206	0.933034	1.45943	0.930231	1.69004	0.0912069
AT3G27380	1.00206	0.846624	0.815021	0.839614	0.846507	0.917019	1.42325	1.30991	2.1264	0.0336156
At3G46560|TIM9	0.975217	1.22363	0.893154	1.03354	1.06324	1.06242	0.862385	0.886413	0.537466	0.591017
At3G46560|TIM9	0.981501	1.10503	0.976753	1.01956	0.899746	0.984971	0.967808	1.06462	0.354704	0.722856
At3G46560|TIM9	1.02327	1.05223	1.00437	0.913496	1.02557	0.992515	0.999381	0.989168	0.0283824	0.977361
AT3G52300.1	0.967002	1.12025	1.00076	0.904205	0.997311	1.02571	0.90667	1.0781	0.033352	0.973398
AT3G52300.1	1.19028	0.967634	1.02427	0.887493	0.953693	0.91896	1.13974	0.917939	0.298269	0.765535
AT3G52300.1	1.20774	1.01874	1.12705	0.881416	0.977545	0.94326	0.84816	0.996085	1.00586	0.314626
AT3G52300.1	0.931544	1.01109	1.11028	0.815562	1.01145	0.872598	1.17489	1.07259	0.56309	0.573449
AT3G54110.1	0.79007	0.992934	1.05685	0.79965	1.15598	1.07793	1.11194	1.01465	1.54334	0.122936
AT3G54110.1	0.874679	0.854482	1.03908	1.0196	0.857449	0.997959	1.07227	1.28449	0.908314	0.363843
AT3G54110.1	1.14245	1.01329	1.00687	0.985345	0.900146	0.968903	0.963204	1.0198	0.633411	0.526552
AT3G54110.1	0.837636	0.861044	1.42578	0.917429	0.990562	0.783249	1.17104	1.01325	0.17934	0.857693
AT3G61440|CYSC	1.1733	0.960495	1.08452	1.02946	0.928303	0.806697	1.04651	0.970713	1.06079	0.288938
AT3G61440|CYSC	0.894917	0.841327	1.15123	1.12789	1.01441	0.926381	0.976271	1.06757	0.0657921	0.947551
AT3G61440|CYSC	0.921048	0.870092	1.1211	0.951512	1.12946	0.958571	0.971343	1.07688	0.583301	0.559769
AT3G61440|CYSC	0.983043	0.886163	0.884039	1.20688	1.19401	0.970554	0.912087	0.963219	0.170694	0.864485
At4g00570.1|NAD-ME2	0.937053	0.999153	1.0397	1.06017	1.12454	0.925914	0.858029	1.05545	0.154422	0.877295
At4g00570.1|NAD-ME2	0.862794	1.08458	1.04721	1.08001	0.838022	0.868405	1.06252	1.15647	0.319337	0.74951
At4g00570.1|NAD-ME2	1.12799	1.00447	1.03515	0.933268	1.02914	0.843945	1.07161	0.95443	0.431881	0.665883
At4g00570.1|NAD-ME2	1.14975	1.05064	0.904359	1.17818	1.06569	0.801567	0.833403	1.01641	1.21129	0.225956
AT4G02580.1	1.09274	0.870417	0.974247	0.747941	0.931469	1.02847	1.00052	1.35419	1.34713	0.178122
AT4G02580.1	0.9631	0.841133	0.922124	0.927946	1.09381	1.28864	1.01547	0.947766	1.48	0.139062
AT4G02580.1	0.965626	1.15428	0.899469	1.01701	0.87808	0.868883	1.13596	1.08068	0.155795	0.876213
AT4G05020.2	1.03728	0.99387	1.07901	0.6634	1.09183	1.22287	0.953814	0.957916	0.96943	0.332471
AT4G05020.2	0.993306	1.06126	0.960994	0.993728	0.994029	1.00065	0.904705	1.09133	0.0397835	0.968271
AT4G05450.1	0.97041	1.14903	1.16071	0.597135	1.20099	0.854185	0.936547	1.131	0.525371	0.599395
AT4G12130.1	0.894093	0.955027	1.00315	1.09463	1.11012	0.919967	0.974791	1.04822	0.227319	0.820204
AT4G12130.1	1.01481	1.08786	0.999623	0.962825	0.952577	1.06454	0.901726	1.01604	0.278795	0.780436
AT4G19540.1	0.974891	1.03369	0.955015	1.04625	1.01117	0.925873	1.01681	1.0363	0.042149	0.966385
AT4G19540.1	1.12104	0.921819	0.829845	1.0232	1.10392	0.898014	1.00043	1.10173	0.445655	0.655904
AT4G22220.1	1.11138	0.976881	1.00543	1.00343	0.963531	0.94508	0.996782	0.997494	0.415764	0.677636
AT4G29480.1	0.782599	0.89388	1.17048	0.925781	1.1122	0.952795	1.18305	0.979213	0.972963	0.330712
AT4G32360.1	0.905849	1.05372	0.841492	1.02938	1.05065	1.07585	1.01512	1.02794	0.72592	0.467989
AT4G32470.1	1.07394	1.08039	0.891728	0.957955	1.12034	0.845541	0.954613	1.07549	0.0171958	0.986282
AT4G32470.1	0.889193	0.870786	0.78213	1.40347	0.924087	1.25601	0.67887	1.19545	0.232974	0.81581
AT4G32470.1	1.03477	0.965136	1.09393	0.890525	1.03401	0.971934	1.01852	0.991175	0.0669764	0.946609
AT4G33010|GDC-P-1	1.03888	1.11638	1.06461	1.01435	1.05424	0.885479	0.924093	0.901978	1.00272	0.316142
AT4G33010|GDC-P-1	1.07933	0.870385	0.896324	0.986487	1.25105	0.89573	0.926897	1.0938	0.716985	0.473483
AT4G33010|GDC-P-1	1.14951	0.841037	0.387216	1.60233	0.99405	1.04083	0.914206	1.07082	0.0852197	0.932097
AT4G37910.1	0.997143	1.3156	0.862009	0.775403	0.926271	1.3439	0.783499	0.99618	0.213408	0.831035
AT4G37910.1	1.14095	1.43089	0.71399	0.828798	0.894516	1.36393	0.56153	1.0654	0.490727	0.623684
AT4G37910.1	1.22569	1.28081	0.815603	0.785544	0.975961	1.2016	0.727984	0.986795	0.460894	0.644935
AT4G37930|AHM	0.873655	1.19692	0.872027	0.780958	0.91826	1.52815	0.786409	1.04362	1.1835	0.236779
AT4G37930|AHM	1.10828	1.24244	1.0342	0.737915	0.809337	1.32957	0.92701	0.811245	0.525903	0.599026
AT4G37930|AHM	1.03544	1.252	0.833574	0.832946	1.14125	1.19771	0.790337	0.916743	0.197103	0.843771
AT5G03905.1	1.04819	1.14876	1.08478	1.04873	0.9502	0.941933	0.899625	0.877783	1.41476	0.157325
AT5G03905.1	0.992166	1.13585	0.971384	1.14822	1.04	0.985545	0.790406	0.936427	1.06013	0.289238
At5g07440.1|GDH2	0.937552	1.03503	0.97867	1.23252	0.864294	1.13856	0.942132	0.871234	0.78679	0.431516
At5g07440.1|GDH2	0.966151	1.29172	0.824346	1.15747	0.795572	1.19487	1.03661	0.73325	1.02618	0.304956
At5g07440.1|GDH2	0.785391	1.16125	0.897559	1.12759	0.917799	1.11376	1.16904	0.827614	0.120746	0.903907
AT5G08670.1	1.40402	1.19894	0.759159	0.941423	0.919065	1.0671	0.855596	0.854708	1.29949	0.193954
AT5G08670.1	1.24975	1.06821	0.836758	1.20053	0.741122	1.30323	0.697183	0.903227	1.52086	0.128483
AT5G08670.1	1.33596	1.07	0.675131	0.997775	0.849682	1.09995	0.659387	1.31212	0.33762	0.735692
AT5G09590.1	1.02546	0.903218	1.12046	0.948014	0.949734	0.9302	1.00584	1.11708	0.0122019	0.990266
AT5G09590.1	1.06765	0.924096	0.94052	1.00199	1.02499	1.00179	1.05144	0.987516	0.28146	0.778392
AT5G11770.1	1.06741	0.804238	1.13838	0.827739	1.00392	0.94744	1.14516	1.06571	0.694562	0.487426
AT5G11770.1	0.997362	1.08831	1.00734	0.985077	0.996277	0.996767	1.12566	0.803214	0.334292	0.738201
AT5G11770.1	1.13485	0.988489	0.82362	0.714816	1.06419	1.0293	1.20856	1.03618	1.44802	0.147799
AT5G13430	0.762721	0.752294	1.2355	0.860913	0.931726	0.93114	1.44847	1.07723	1.66355	0.0963896
AT5G13430	0.728496	0.934785	0.981922	0.826642	1.19852	0.872798	1.35305	1.10379	2.26113	0.0238789
AT5G13430	0.897978	0.879251	1.0329	0.744728	1.05244	1.02038	1.0806	1.29172	1.90574	0.0568549
AT5G13450.1	1.13637	0.936602	1.20067	0.98255	0.909475	0.975276	0.992071	0.86699	1.09679	0.272891
AT5G13450.1	1.0809	1.15417	0.694631	1.08536	1.04641	1.16678	0.882909	0.888849	0.064454	0.948616
AT5G13450.1	1.04501	1.06654	0.951453	1.13623	1.06618	1.0565	0.82121	0.856885	0.852937	0.393816
AT5G13450.1	1.04187	1.171	1.07573	0.737045	1.0768	0.923116	0.90452	1.06991	0.109816	0.912568
AT5G14040.1	0.960652	0.830623	0.945367	0.974598	1.00657	0.960315	1.18899	1.13289	1.23624	0.216543
AT5G14040.1	0.798874	0.7919	0.968547	0.961549	1.08612	0.909649	1.42754	1.05582	2.05125	0.0403977
AT5G14040.1	1.12189	0.941177	0.676566	1.12318	0.861059	1.31036	0.873264	1.09251	0.587359	0.557042
AT5G15090.1	0.947904	1.20379	0.941627	0.869689	0.911199	1.18723	1.05545	0.883106	0.158353	0.874197
AT5G15090.1	0.81881	1.07028	1.0292	0.744463	1.32651	1.01847	0.959177	1.0331	1.44385	0.148967
AT5G15090.1	1.02733	1.08671	0.813036	0.925303	0.959089	1.21431	0.959592	1.01463	0.631984	0.527484
At5g18170.1|GDH1	0.699212	1.06937	0.841455	1.35185	0.879121	1.25899	1.0242	0.875803	0.163142	0.870426
At5g18170.1|GDH1	0.818203	1.24483	0.766885	1.1475	0.808235	1.48992	1.02739	0.697032	0.0966446	0.92302
At5g18170.1|GDH1	0.780042	0.956583	0.601318	1.11173	1.02281	1.33331	1.28427	0.909941	2.35608	0.0185836
AT5G37510|75kDa	1.07908	0.958813	0.842657	0.858106	0.984257	1.07558	0.875777	1.32574	1.11888	0.26335
AT5G37510|75kDa	1.07848	0.941737	0.961809	0.911301	1.06243	0.997707	0.791602	1.25493	0.456669	0.647968
AT5G37510|75kDa	0.919207	0.978431	1.07875	0.830437	1.11896	1.04317	1.03798	0.993071	0.827038	0.408333
AT5G37510|75kDa	1.12658	1.04846	0.935651	0.87479	0.972365	0.906987	1.03431	1.10086	0.0621738	0.950432
AT5G40810.1	0.96835	1.01467	0.889219	0.9311	1.06353	1.06	1.02041	1.05273	0.841953	0.399935
AT5G40810.1	0.987076	1.04968	0.626609	1.04416	0.857498	1.43474	0.837838	1.1624	1.25215	0.210691
AT5G47030.1	1.02795	0.987054	0.97465	0.96407	1.09587	0.950178	1.0518	0.948419	0.1981	0.842991
AT5G47030.1	1.34131	0.932793	1.09156	0.765679	1.00622	0.920014	0.92343	1.019	0.562278	0.574002
AT5G47030.1	1.09114	1.1858	0.716618	1.08301	0.931003	1.12069	0.764339	1.10738	0.327858	0.74306
AT5G57490.1	0.926881	1.01098	0.892942	0.951677	1.09363	0.980038	1.15282	0.991032	0.931234	0.351867
AT5G58270.1	1.07488	0.985586	0.899721	0.739309	1.04692	1.17549	0.998664	1.07943	1.2865	0.198445
AT5G58270.1	1.04018	0.944465	0.913564	0.864991	1.05596	0.999053	1.08637	1.09542	1.0138	0.310825
AT5G65720.1	1.09959	1.0606	0.765048	1.12368	0.966994	1.08459	0.830195	1.0693	0.209407	0.834156
AT5G65720.1	1.18511	0.972036	1.06482	1.0649	0.900809	0.992602	0.81167	1.00805	1.22813	0.21957
AT5G65720.1	0.952374	0.971183	0.967007	0.94567	1.0556	1.01594	1.06499	1.02724	0.701118	0.483327
AT5G65720.1	0.981317	1.13986	0.603861	1.12156	0.981863	0.926465	0.984886	1.2602	0.656774	0.511416
AT5G66760|SDH1-1	1.05942	0.937613	1.1121	0.865323	1.05206	0.965576	1.03541	0.972486	0.109333	0.912952
AT5G66760|SDH1-1	1.25973	0.870941	0.863054	1.04312	0.933247	0.986359	1.05024	0.99331	0.157725	0.874692
AT5G66760|SDH1-1	1.10517	0.984582	1.02464	1.05728	0.862449	1.05045	0.930201	0.98523	0.734964	0.462464
AT5G66760|SDH1-1	1.22703	0.79442	0.972963	1.12191	0.95204	0.941549	0.92075	1.06934	0.497989	0.618557
AT5G67500.1	0.962697	1.06101	1.11826	0.969584	0.993745	0.934929	0.938057	1.02172	0.477578	0.633013
AT5G67500.1	0.963963	1.04243	0.842918	0.977042	0.975635	0.950917	1.1829	1.06419	0.743411	0.457337
AT5G67500.1	1.23867	1.08025	0.877452	0.961874	0.836571	1.01708	0.963096	1.02502	0.677455	0.498211
ATMG00160|COX2	0.979296	0.843382	1.12239	0.926097	0.817139	1.08767	1.02695	1.19707	0.551585	0.581307
ATMG00160|COX2	1.13294	0.859908	0.962574	0.930148	1.04441	1.08202	1.12283	0.865172	0.489899	0.624269
CAA69752.3	0.911546	0.856252	1.0506	0.715208	1.01416	0.755289	1.62813	1.06881	1.99671	0.046018
CAA69752.3	0.920709	0.846342	0.584387	1.23648	1.18078	0.937791	1.23057	1.06293	1.76418	0.0778834
CAA69752.3	1.03499	0.806823	0.901042	1.07173	1.06639	0.970267	0.995462	1.15328	0.79376	0.427447
cox1	0.729923	0.854519	0.913084	1.06168	1.12228	1.28374	0.922205	1.11257	1.88713	0.0593161
CS4_AT2G44350.1	1.01139	0.955101	1.19187	1.06139	0.933233	0.809372	1.118	0.919654	0.940769	0.346959
CS4_AT2G44350.1	0.853753	0.830375	0.815958	1.26678	1.11978	1.17901	1.14728	0.787063	0.998093	0.318378
CS4_AT2G44350.1	0.998816	0.971296	0.996765	1.0217	1.06359	0.946741	0.983648	1.01744	0.0488895	0.961013
FER4	0.812136	0.656304	0.842909	1.17098	1.39669	1.06987	1.01223	1.03888	2.21624	0.026809
FRATAXIN	1.03733	0.853981	0.567063	1.29571	1.05519	0.971474	1.19378	1.02548	1.05284	0.292567
FUM_AT5G50950.1	0.893075	1.16459	0.73093	1.25238	1.10254	1.02347	0.814307	1.01871	0.175434	0.86076
FUM_AT5G50950.1	1.02791	1.20679	0.720195	1.07609	1.0991	0.864536	0.926007	1.07938	0.132653	0.894484
ICDH_AT1G54340.1	0.896672	1.2173	1.14783	0.70469	0.873771	1.31325	1.19204	0.65444	0.143433	0.885965
ICDH_AT3G09810.1	0.8869	0.916108	0.934258	1.14382	1.11264	1.04105	1.04518	0.920053	0.509105	0.610746
ICDH_AT3G09810.1	0.801106	0.899292	1.09994	1.11502	1.09538	0.921913	1.07418	0.993175	0.36238	0.717114
ICDH_AT3G09810.1	0.928736	0.936989	0.997796	1.18499	0.940317	0.823625	1.0752	1.11235	0.207693	0.835494
ICDH_AT5G03290.1	0.933895	0.921452	1.14009	1.00525	1.04849	1.01209	0.923556	1.01517	0.00295127	0.997646
ICDH_AT5G03290.1	0.993267	0.886531	1.10847	1.17519	0.926245	0.817802	0.945459	1.14703	0.699819	0.484138
ICDH_AT5G03290.1	1.2077	1.01048	0.808966	1.19865	1.00228	1.09916	0.772971	0.899792	0.96668	0.333844
ICDH_AT5G14590.1	0.988604	0.901468	0.971253	1.06448	1.06481	0.851431	0.85201	1.30594	0.317622	0.750812
ICDH1_AT4G35260.1	0.970955	1.00771	0.900877	1.10301	0.952373	0.912643	1.22282	0.929608	0.074686	0.940473
ICDH1_AT4G35260.1	0.755779	1.09802	1.04987	1.07942	1.25991	0.852586	0.982219	0.922203	0.0724244	0.942273
ICDH1_AT4G35260.1	0.792298	0.966941	1.18056	1.04487	1.18999	1.09814	0.771291	0.955908	0.0656457	0.947668
ICDH2_AT2G17130.1	0.997259	0.940237	0.827924	1.06365	1.0414	1.32817	0.912805	0.888553	0.731789	0.464399
ICDH2_AT2G17130.1	0.92602	0.930544	1.00903	1.07868	1.04279	1.24958	0.860974	0.90239	0.238605	0.811441
MDH2_AT3G15020.1	1.04253	0.969014	1.24097	0.925403	1.11076	0.900095	0.927666	0.883562	0.761716	0.446337
MDH2_AT3G15020.1	0.886281	0.965066	0.842858	1.09051	1.02375	1.24437	0.874475	1.07269	0.921662	0.356838
MDH2_AT3G15020.1	1.02089	1.01665	0.956663	0.974158	1.15005	0.99419	0.8626	1.0248	0.13542	0.892296
MPC1	0.954539	0.977446	0.904876	0.854302	1.12279	1.03937	1.33692	0.809764	1.32219	0.186285
MPC1	0.933484	0.986287	0.923548	1.12655	0.857256	1.25309	0.964098	0.955685	0.128982	0.897387
MPC2/NGRA1	0.984639	0.890583	1.03028	0.969806	1.30554	0.914226	1.10258	0.802349	0.53385	0.593516
MPC2/NGRA1	0.912375	1.01609	1.05408	0.84779	0.992548	1.11671	0.991287	1.06913	0.726389	0.467702
MPC2/NGRA1	0.753472	0.733585	0.747999	1.246	1.15898	0.774945	1.48368	1.10134	2.22171	0.0264363
NP_001077919.1	0.940804	1.02435	1.00248	0.9132	0.881766	1.09988	1.06201	1.07551	0.510179	0.609993
NP_001077919.1	1.05349	0.913857	1.06314	0.853192	0.886816	1.20679	1.10209	0.92062	0.497982	0.618562
PDH_AT1G54220.1	1.0226	1.10688	1.00536	0.857238	1.01172	0.88882	0.851398	1.25598	0.033892	0.972967
PDH_AT1G54220.1	0.945064	0.97026	1.01767	0.783552	1.17767	0.94005	1.18664	0.979096	1.21353	0.225099
PDH_AT1G54220.1	0.790578	1.01392	1.15288	1.01811	1.02299	0.820465	1.01741	1.16365	0.104955	0.916424
PDH_AT1G54220.1	0.963551	1.44521	0.932698	1.04357	0.879172	1.01934	0.880321	0.836134	1.64839	0.0994607
PDH_AT3G13930.1	0.776865	1.03913	0.843939	1.18107	1.12062	0.848438	1.08197	1.10796	0.680688	0.496163
PDH_AT3G13930.1	1.16146	0.850541	1.03131	1.0406	1.18758	0.840057	1.00096	0.887502	0.359225	0.719472
PDH_AT3G13930.1	1.04228	1.0689	1.05441	0.935945	1.00178	0.925211	0.924957	1.04652	0.434691	0.663843
PDH_AT3G52200.1	1.06722	0.905139	1.00887	1.08594	0.924869	0.939807	1.07262	0.995538	0.287531	0.773742
PDH_AT3G52200.1	0.876449	0.957558	1.24408	0.784032	1.07951	1.07199	1.01698	0.969393	0.590282	0.555081
PDH_AT3G52200.1	0.963927	0.874505	1.1067	1.18417	0.944402	0.848538	1.11775	0.960012	0.55355	0.57996
PDH_DLD_AT1G48030.1	0.892847	1.21992	0.870682	0.946508	0.943774	1.01462	1.1649	0.946748	0.299874	0.764311
PDH_DLD_AT1G48030.1	0.854338	1.16235	0.930266	0.947314	0.963966	1.1482	0.957776	1.03579	0.452646	0.650863
PDH_DLD_AT1G48030.1	0.88517	1.56858	0.787558	1.53779	0.838941	0.975701	0.628424	0.777832	3.33549	0.000870116
PDH_DLD_AT3G17240.1	0.732359	0.804197	0.622308	1.11609	1.21511	0.800867	1.61619	1.09288	3.10406	0.00194082
PDH_DLD_AT3G17240.1	0.745866	0.990769	0.630122	1.24927	1.00622	0.97913	1.34006	1.05855	1.64384	0.100397
PDH_DLD_AT3G17240.1	0.844551	1.56472	0.446376	0.688175	1.49311	0.796842	0.985713	1.18051	1.95297	0.050989
PDH_DLD_AT3G17240.1	0.92325	1.28689	0.785751	1.34628	0.82093	1.11895	0.67779	1.04016	1.4649	0.143137
PDH_DLST_AT4G26910.1	0.931818	0.873149	1.0279	1.16635	0.899644	1.00363	1.11977	0.977739	0.003381	0.997303
PDH_DLST_AT4G26910.1	1.00682	0.915477	1.09493	1.06994	0.969512	0.805755	1.13732	1.00025	0.373164	0.709073
PDH_DLST_AT4G26910.1	0.831424	0.998915	0.886004	1.1146	1.10262	0.976182	0.878679	1.21157	0.723764	0.469312
PDH_DLST_AT5G55070.1	1.49777	0.91604	1.09943	0.873503	0.892905	0.905148	0.827675	0.987526	1.65573	0.0979634
PDH_DLST_AT5G55070.1	1.06861	0.814951	1.01944	0.870836	1.12121	0.980245	1.11589	1.00881	0.968241	0.333064
PDH_E1_AT1G59900.1	1.1143	0.928464	1.01864	0.921385	1.00565	1.02458	0.999788	0.987191	0.0736874	0.941268
PDH_E1_AT1G59900.1	0.956561	0.963253	0.867898	1.13911	0.997637	1.12309	1.10552	0.846919	0.313268	0.754116
PDH_E1_AT1G59900.1	1.06711	1.15441	0.873169	1.00063	1.11678	0.917709	0.863014	1.00718	0.408086	0.683263
PDH_E1_AT1G59900.1	1.01685	0.980274	1.01605	1.03529	0.998508	1.01195	0.986694	0.954379	0.207498	0.835647
PDH_IAR1_AT1G24180.1	1.16057	1.11803	1.04435	0.957293	1.12267	0.934027	0.928967	0.734089	1.19979	0.230392
PDH_IAR1_AT1G24180.1	1.18289	1.09199	0.720467	0.916889	0.924178	1.02129	1.12351	1.01879	0.375754	0.707147
PDH_IAR1_AT1G24180.1	1.05562	1.13411	1.01818	1.04959	0.882595	0.940487	1.00799	0.911426	1.10243	0.270432
PDH_IAR1_AT1G24180.1	0.955683	1.03874	0.991185	0.998144	1.00468	0.948325	1.07221	0.991042	0.0695747	0.94454
PDH_MAB1_AT5G50850.1	0.915815	1.05886	0.944453	1.07826	1.01827	0.95551	1.04302	0.985814	0.0111999	0.991065
PDH_MAB1_AT5G50850.1	1.00434	1.17134	0.714879	1.25252	0.907418	1.05733	0.807714	1.08446	0.612536	0.540266
PDH_MAB1_AT5G50850.1	0.859454	1.08077	0.770088	1.1786	1.01302	1.1926	0.739359	1.16611	0.475584	0.634433
PDH_MAB1_AT5G50850.1	1.02668	1.05043	0.950837	0.965836	0.999008	1.0004	1.11863	0.888183	0.0266198	0.978766
SDH_AT5G62575.1	0.838894	0.782961	1.00939	0.962232	1.07733	1.1163	1.11236	1.10053	1.7404	0.0819732
SDH2_AT3G27380.1	0.974463	1.12035	0.982087	0.977294	1.06634	0.750478	0.90392	1.22507	0.232002	0.816565
SDH2_AT3G27380.1	0.84113	1.10646	0.945208	1.29105	1.20101	0.975479	0.747843	0.891827	0.78707	0.431352
SDH5_AT1G47420.1	1.0449	0.854088	1.13591	0.837952	1.04612	0.993837	0.984609	1.10258	0.544349	0.586274
SDH5_AT1G47420.1	0.988587	1.11164	1.01779	0.839875	0.953525	1.13404	1.12908	0.825456	0.180261	0.856969
SDH5_AT1G47420.1	1.06381	1.01068	0.936817	0.963878	1.09119	0.955273	0.98206	0.996297	0.10624	0.915404
SDH7_1_AT3G47833.1	1.34302	0.908715	0.850199	0.72854	1.00218	1.14614	0.962166	1.05903	0.72577	0.468081
SDHaf2_AT5G51040.1	1.11876	0.977869	1.0656	0.811105	1.07516	0.987261	1.02842	0.935834	0.114186	0.909104
SDHaf2_AT5G51040.1	0.849362	0.762255	0.948222	0.897581	1.43523	1.10397	0.825541	1.17783	2.32289	0.0203045
sp|P92983.2|PROD1_ARATH	1.06234	0.864016	0.45071	0.915405	0.749522	1.61295	0.946037	1.39902	3.02909	0.00249046
succinyl_CoA_synthetase_AT2G20420.1	0.945593	1.00197	1.11982	1.06366	0.91455	0.958422	1.04255	0.953441	0.561009	0.574867
succinyl_CoA_synthetase_AT2G20420.1	1.21901	1.13224	0.743805	1.03225	0.912178	0.985808	0.673342	1.30137	0.545015	0.585816
succinyl_CoA_synthetase_AT2G20420.1	1.08312	0.969045	0.921463	1.23278	0.953318	0.974086	0.861356	1.00483	0.883662	0.377005
succinyl_CoA_synthetase_AT5G08300.1	1.00644	1.07156	0.981373	1.27601	0.938	0.8127	0.937514	0.976406	1.43583	0.151238
succinyl_CoA_synthetase_AT5G08300.1	1.1281	0.943706	0.805153	0.904003	1.2394	0.972628	0.99157	1.01544	0.937762	0.348502
succinyl_CoA_synthetase_AT5G23250.1	0.99111	1.11255	0.696527	1.29547	0.969318	1.1627	0.784192	0.988133	0.409524	0.682208
The
